# Supplementary material for: Digging below the surface: the hidden quality of the OECD nanosilver dossier
Source: Royal Society of Chemistry journal article supplement (doi:10.1039/c7en00088j), 2017-01-01
Supplement: c7en00088j1.xlsx [file c7en00088j1.xlsx]

## Sheet: Feuil2
	1. Paper/report Information										2. Information/Identification						3. Chemical Identity				4. Physical Identity				5. Sample preparation					6. Testing parameters						7. Fundamental Behaviour
Report/study number	a. Author	b. Year	c. Title	c. Type	d. Reviewed?	e. Endpoint	f. OECD dossier	g. Journal or testing laboratory	h. Impact factor		a. NM used	c. Form	d. Manufacturer	e. Batch	f. OECD material?		a. composition	b. Impurities	c. Coatings		a. Particle size, size distribution	c. Basic shape	d. BET surface		a. medium of dispersion	b. Preperation of stock/direct dosing	c. Way of dispersal	d. Nominal concentration of stock solution		a. Type of medium used	b. Concentration used for the assay	c. Controls?	d. Check for interferences?	e. Test organism		a. Solubility in test medium	b. Solubility during exposure	c. Particle size distribution in test medium (agglomeration)	d. Particle size distribution during exposure (agglomeration)	c. Zeta potential in test medium
1	Lee et al.	2012	Toxicity of Citrate- Capped Silver Nanoparticles in Common Carp (Cyprinus carpio).	publication	yes	Short-term toxicity to fish	ENV/JM/MONO(2015)16/PART1 (pp.180-185 and 242-245)	Journal of Biomedicine and Biotechnology	In 2014: 3.169		Citrate capping silver nanoparticle	black colloidal suspension	ABC NANOTECH C., LTD, KOREA	NA	yes		20% cAgNP by weight	NA	Citrate capping (0.5-1.5%)		15nm according to manufacturer, 12 nm using TEM. 5mg/L: mean=71.7nm; 10mg/L: mean=91.2nm in deionised water (TEM and DLS)	Spherical	NA		deionised water	preperation of stock solution	NA	10 mg/L		freshwater dechlorinated and continuously aerated	25,50,100 and 200 µg/L of cAgNP	negative control but no positive controls	NA	Cyprinus carpio		NA	NA	NA	NA	NA
2	Christian Polleichter	2013	Fish embryo test using Danio rerio	study report	no	Short-term toxicity to fish	ENV/JM/MONO(2015)16/PART1 (pp.185-241)	Umwelt Bundesamt	×		NM-300K	yellow-brown colloidal suspension (JRC)	JRC	the same for all NM-300K	yes		10% w/w% NM-300K and 4% w/w% each of Polyoxyethylene Glycerol, Trioleate and Polyoxyethylene Sorbitan mono-Laurat (see JRC repository)	NA	none		~15nm and 5nm (see size distribution in JRC report)	mostly round, but also triangular or trapezium-like (JRC report)	NA		deionised water	preperation of stock solution	ultrasonicated for 15min (VWR USC+==T @ 45 kHz)	2% silver content (according to SOP TUDr)		as described in DIN 38415T6. Test medium for growth inhibition of Danio rerio contains several mineral salts and has the ionic strength of 8.4 mM (calculated using PHREEQCi v.3, USGS). Main components are CaCl2, NaHCO3, MgSO4 and KCl	1) NM300K 1: control0.3, 0.5, 0.6, 0.7, 0.8, 0.9, 1.0 mg /L; 2) NM300K 2: 0.5, 1.0, 1.25, 1.5, 2.0 mg/L; 3) NM300K3: 0.5, 0.75, 1.0, 1.25, 1.5, 2.0 mg/L; 4) silver ions: 0.025, 0.051, 0.064, 0.076, 0.102, 0.127, 0.152 mg/L; 5) silver nitrate 1: 0.02, 0.04, 0.06, 0.08, 0.10, 0.12, 0.14 mg/L; 6) silver nitrate 2: 0.04, 0.08, 0.10, 0.12, 0.12, 0.20, 0.24 mg/L	negative and positive (AgNO3)	NA	Danio rerio		NA	NA	In 10mg/L test medium: 46±10nm (day 0)38±11nm (day1); 33±7nm (day 2) (DLS). No agglomeration, UVvis spectra (Dr Hach Cadas 200) show a slight shift of plasmon resonance from 412 nm (for NM-300K in water) to 408 nm (in test medium) at end of test period at day 2 (n = 3).	NA	-10.0 ± 1.0 mV (day 0, @ pH 7.3 ± 0.1),-10.0 ± 2.0 mV (day 1, @ pH 7.4 ± 0.1),-8.0 ± 0.6 mV (day 2, @ pH 7.6 ± 0.1)
3	Eunjoo Bae et al.	2012	Effect of agglomeration of silver nanoparticle on nanotoxicity depression	publication	yes	Short-term toxicity to fish/Long-term toxicity to fish	ENV/JM/MONO(2015)16/PART1 (pp.246-249) and ENV/JM/MONO(2015)16/PART2 (pp.14-23)	KOREAN JOURNAL OF CHEMICAL ENGINEERING	In 2015: 1.408		AgNP	silver powder	Sigma-Aldrich	NA	no		pure	none	none		~63 nm in Milli Q water (TEM)	polyhedral	surface area: 113 cm2/L (Bae et al. 2010)		Milli Q water	preperation of stock solution	ultrasonication, stirring and nano-filtration (100nm, Adventech)	NA		dechlorinated tap water and aerated	50,100 and 150 mg/L	negative control	NA	Oryzias latipes		Ag+ ion ratio (2, 9, 5, 14, 23, 40, 52, 76, and 100%) at 25 μg/L of AgNPs	Ag+ ion ratio (2, 9, 5, 14, 23, 40, 52, 76, and 100%) at 25 μg/L of AgNPs	NA	TEM images	NA
4	J. Cho et al.	2013	Stepwise embryonic toxicity of silver nanoparticles on Oryzias latipes	publication	yes	Short-term toxicity to fish/Long-term toxicity to fish	ENV/JM/MONO(2015)16/PART1 (pp.250-253) and ENV/JM/MONO(2015)16/PART2 (pp.23-33)	Biomed Research International	In 2015: 2.134		Citrate capping silver nanoparticle	colloidal suspension	ABC NANOTECH C., LTD, KOREA	NA	yes		20% cAgNP by weight	NA	Citrate capping (0.5-1.5%)		8.3±4.35nm (TEM). In 10mg/L deionized water: 36.8±10.2nm in stock solution	elliptical or multifaceted	NA		Deionised water	preperation of stock solution	NA	10 mg/L		freshwater dechlorinated and continuously aerated	0.1, 0.25, 0.5, 0.75, and 1.0 mg/L	negative control	NA	Oryzias latipes		NA	NA	NA	NA	see Figure 1 in J.Cho et al. (2013)
5	Schaefers C.	2013	Fish early life stage toxicity test with Danio rerio and nanosilver. IN: Investigation of two widely used nanomaterials (TiO2, Ag) for ecotoxicological long-term effects - adaptation of test guidelines	study report	no	Long-term toxicity to fish	ENV/JM/MONO(2015)16/PART2 (pp.33-38)	Federal Environment Agency Germany	×		NM-300K	yellow-brown colloidal suspension (JRC)	JRC	the same for all NM-300K	yes		10% w/w% NM-300K and 4% w/w% each of Polyoxyethylene Glycerol, Trioleate and Polyoxyethylene Sorbitan mono-Laurat	NA	none		~15nm and 5nm (see size districution in JRC report)	mostly round, but also triangular or trapezium-like (JRC report)	NA		aqua dest.	preperation of stock solution	ultra-sonication for 15 min (35 kHz; 215/860 W)	0.2 mL Ag/mL		freshwater: hardness=1.0-1.3 mmol/L, T°=25.0 - 27.3 °C, pH=8.2 - 8.7, dissolved oxygen=6.0 - 8.1 mg/L, corresponding to 76 - 100 %, Salinity=271 - 328 μS/cm (conductivity)	pre-test: 400 μg/L; first test: 200 , 100, 50, 25, 12.5 μg/L; second test: 100, 50, 12.5 μg/Lmeasured test concentrations: pre-test: 455 μg/L; first test: 136 , 69.2, 34.3, 18.1, 8.95 μg/L; second test: 47.4, 23.2, 5.9 μg/L	yes (untreated fish)	NA	Danio rerio		approximately 3%	NA	from 14nm to 438nm (in 7 d), but generally around 50-60 nm.It was done with 400 µg/L (pre-test). See Table 45 in Schaefers C. (2013)	NA	NA
6	Asghari et al.	2012	Toxicity of Various Silver Nanoparticles Compared to Silver Ions in Daphnia magna.	publication	yes	short-term toxicity to aquatic invertebrates	ENV/JM/MONO(2015)16/PART2 (pp.38-49)	Journal of Nanobiotechnology	In 2015: 4.239		1) Citrate capping silver nanoparticle; 2) Nanocid L200; 3) AgNP powder; 4) AgNO3	1) blackish-brown colloidal suspension; 2) yellowish-brown colloidal suspension; 3) black powder	1) ABC NANOTECH C., LTD, KOREA; 2) Nano Nasb Pars Co., Ltd (Tehran, Iran); 3) Xuzhou Hongwu Nanometer Material Co., Ltd (Jiangsu, China); 4) Fluka chemika, Sigma- Aldrich, Switzerland	NA	1) yes; 2) no; 3) no		1) 20% cAgNP by weight and 1% citrate by weight (99.8% purity according to manufacturer); 2) 4.5 g of LABS with 95 ml of distilled water, 0.32 g of silver nitrate and 0.2 g of a hydrazine solution (0.03 M); 3) 99% purity according to manufacturer	NA	1) Citrate capping (0.5-1.5%)		1) 5-25nm according to manufacturer. According ot the authors: max diameter= 15.83nm (TEM) and median diameter= 7.32nm (CMD); 2) ~16.6nm according to manufcturer. According to the authors: max diamter= 129nm (TEM), median diameter= 6.47nm (CMD); 3) 20 nm according to manufacturer. According to the author: max diameter= 161nm (TEM) and median diameter= 17.97nm (CMD).	1) mostly spherical according to manufacturer; 2) spherical according to manufacturer; 3) spherical according to manufacturer	NA		1) not specified; 2) not specifed; 3) deionized water; 4) deionized water; all stock solutions were then mixed with M4 media	1) not specified; 2) not specified; 3) preperation of stock solution; 4) preperation of stock	1) not specified; 2) not specified; 3) vigorous vortexing for 30 min and then 6 hours sonication; magnetic stirrer for mixing all the stocks in M4 media	1) not specified; 2) not specified; 3) 400mg AgNp/L; 4) 400mg AgNO3/L		M4 media	1) 0.001, 0.002, 0.003, 0.004, 0.005, 0.006, 0.007, 0.008, 0.009 and 0.01 mg/L; 2) 0.001, 0.0012, 0.0015, 0.0017, 0.002, 0.0022, 0.0027, 0.03, 0.0032 mg/L; 3) 0.1, 0.125, 0.150, 0.175, 0.2, 0.225, 0.25, 0.275, 0.3, 0.32 mg/L; 4) 0.001, 0.0012, 0.0015, 0.0018, 0.0021, 0.0024, 0.0027, 0.0029, 0.0032, 0.0034 mg/L	positive (AgNO3) and negative	NA	Daphnia magna		NA	NA	1) no aggregates (the solution was stable) (UV-vis); 2) no aggregates (the solution was stable) (UV-vis); 3) 52.9% aggregates, out of which 70.31% had diameter from 25 to 100nm, and the rest had diameters from 100 to 250nm (TEM).	NA	NA
7	Christian Polleichter	2013	Daphnia magna Acute Toxicity Test	study report	no	short-term toxicity to aquatic invertebrates	ENV/JM/MONO(2015)16/PART2 (pp.49-185)	Federal Environment Agency Germany	×		NM-300K	yellow-brown colloidal suspension (JRC)	JRC	the same for all NM-300K	yes		10% w/w% NM-300K and 4% w/w% each of Polyoxyethylene Glycerol, Trioleate and Polyoxyethylene Sorbitan mono-Laurat (see JRC repository)	NA	none		~15nm and 5nm (see size districution in JRC report)	mostly round, but also triangular or trapezium-like (JRC report)	NA		deionized water	preperation of stock solution	ultrasonicated for 15min (VWR USC+==T @ 45 kHz)	2% silver content (according to SOP TUDr)		medium Elendt M4 and Elendt M7 (main components are CaCl2, NaHCO3, MgSO4 and NaNO3.)	1) NM300K 1: 0.001, 0.002, 0.004, 0.008, 0.016, 0.0.032, 0.064, 0.128 mg/L; 2) NM300K 2: 0.01, 0.02, 0.03, 0.04, 0.05, 0.07, 0.08 mg/L; 3) NM300K 3: 0.01, 0.02, 0.04, 0.06, 0.08, 0.10, 0.12, 0.14 mg/L; 4) NM300K 4: 0.01, 0.02, 0.03, 0.04, 0.05, 0.06, 0.07, 0.08 mg/L; 5) AgNO3 1: 0.001, 0.002, 0.004, 0.008, 0.016, 0.032, 0.064, 0.128 mg/L; 6) AgNO3 2: 0.003, 0.005, 0.006, 0.008, 0.010, 0.012, 0.01…	positive (AgNO3) and negative	yes use of NM 300K DIS	Daphnia magna		In 10mg/L test medium M7: Dissolved silver content was (via ultrafiltration using Sartorius Vivaspin 500 MWCO 3000 prior to GF-AAS) (n ≥ 4)0.05 ± 0.01 mg Ag/L (day 0)0.04 ± 0.01 mg Ag/L (day 2)	NA	In 10 mg/L test medium M4:43 ± 9 nm (day 0), 159 ± 35 nm (day 1),141 ± 31 nm (day 2). Slight agglomeration, UVvis spectra (Dr Hach Cadas 200) show no shift of plasmon resonance from 412 nm (for NM-300K in water) to 412 nm (in test medium Elendt M4) at end of test period at day 2 (n = 3), but a second resonance appears at approximatedly 600 nm.	NA	In 10mg/L test medium Elendt M4 gave (each n = 3)-9.5 ± 1.3 mV (day 0, @ pH 7.8 ± 0.1),-6.4 ± 0.8 mV (day 1, @ pH 7.9 ± 0.1),-6.5 ± 0.3 mV (day 2, @ pH 7.9 ± 0.1).
8	Völker et al.	2013	Comparative toxicity assessment of nanosilver on three Daphnia species in acute, chronic and multigeneration experiments	publication	yes	short-term toxicity to aquatic invertebrates and long-term toxicity to aquatic invertebrates	ENV/JM/MONO(2015)16/PART2 (pp.186-188 and pp. 228-230)	PLOS one	in 2015: 3.057		NM-300	yellow-brown colloidal suspension (JRC)	NM-300 from RAS GmbH (Regensburg, Germany) and AgNO3 from Merck KGaA (Darmstadt, Germany)	the same for all NM-300	yes		10% silver, 7% ammonium nitrate, 8% emulsifier, and 75% de-ionised water.	NA	Polyvinylpyrrolidone- (PVP-) coated nanosilver		~15nm and 5nm (see size districution in JRC report)	mostly round, but also triangular or trapezium-like (JRC report)	NA		demineralized water	preperation of stock	stirring for 30 seconds	100 mg/20 mL		M4 medium without EDTA, 90% dissolved oxygen, pH = 7-9	1) D. magna: 2.5, 5, 10 μg/L; 2) D. galeata: 1.25, 2.5, 5, 10 μg/L; 3) D. pulex: 1.25, 2.5, 5 μg/L	highest nanosilver concentration and AgNO3	yes use of NM 300K DIS	Daphnia magna (IBACON cloneA), Daphnia galeata, Daphnia pulex (inhouse culture)		less than 2% in the ionic form after 48h	NA	In 10mg/L test medium: 57.6±1.20 nm (DLS).	NA	-17.4 mV in M4 medium
9	Hoheiseil S, et al.	2012	Comparison of Nanosilver and Ionic Silver Toxicity in Daphnia magna and Pimephales promelas	publication	yes	short-term toxicity to aquatic invertebrates	ENV/JM/MONO(2015)16/PART2 (pp.188-191)	Environmental Toxicology and Chemistry	in 2015: 2.763		AgNP	aqueous suspension	NanoComposix for nanosilver	NA	yes		1,000mg total Ag/L aqueous suspensions in 2mM phosphate buffer,	NA	uncapped		10, 20, 30 and 50 nm. 1) 10nm: 38.7 nm in phosphate buffer and 35.3 nm in deionized water (10mg/L); 2) 20nm: 30.4 nm in phosphate buffer and 30.5 nm in deionized water (10mg/L); 3) 30nm: 35.2 nm in phosphate buffer and 35.9 nm in deionized water (10mg/L); 4) 50nm: 49.3 nm in phosphate buffer and 49.5 nm in deionized water (10mg/L)	spherical	NA		deionised water	preperation of stock	NA	Not specified		sand-filtered and UV-treated Lake Superior (St. Louis County, MN, USA) water. Lake Superior water has low to moderate ionic strength and dissolved organic carbon no greater than 2 mg C/L.	Not specified	negative control (sand-filtered and UV-treated Lake Superior (St. Louis County, MN, USA) water) and positive control (AgNO3)	yes preliminary study to determine whether phosphate buffer was toxic	Daphnia magna and Pimephales promelas		NA	NA	1) 10nm: 360 nm in Lake Superior water (0h)and 233 nm after 24h (2mg/L); 2) 20 nm: 64 nm in Lake Superior water (0h)and 253 nm after 24h (2mg/L); 3) 30nm: 151 nm in Lake Superior water (0h)and 173 nm after 24h (2mg/L); 4) 50nm: 178 nm in Lake Superior water (0h)and 171 nm after 24h (2mg/L)	1) 10nm: 477 nm in simulated test water (0h) and 356 nm after 24h (2mg/L); 2) 20nm: 72 nm in simulated test water (0h) and 163 nm after 24h (2mg/L); 3) 30nm: 160 nm in simulated test water (0h) and 185 nm after 24h (2mg/L); 4) 50nm: 182 nm in simulated test water (0h) and 171 nm after 24h (2mg/L)	NA
10	Christian Polleichtner	2013	Daphnia magna Reproduction Toxicity	study report	no	Long-term toxicity to aquatic invertebrates	ENV/JM/MONO(2015)16/PART2 (pp.191-227)	Federeal Environment Agency Germany	×		NM-300K	yellow-brown colloidal suspension (JRC)	JRC	the same for all NM-300K	yes		10% w/w% NM-300K and 4% w/w% each of Polyoxyethylene Glycerol, Trioleate and Polyoxyethylene Sorbitan mono-Laurat (see JRC repository)	NA	none		~15nm and 5nm (see size districution in JRC report)	mostly round, but also triangular or trapezium-like (JRC report)	NA		medium Elendt M7	preperation of stock solution	ultrasonicated for 15min (VWR USC+==T @ 45 kHz)	2% silver content (according to SOP TUDr)		medium Elendt M4 (main components are CaCl2, NaHCO3, MgSO4 and NaNO3.)	0.1, 0.2, 0.5, 1.6, 5.2, and 16.8 µg/L	negative control	NA	Daphnia magna		Dissolved silver content was (via ultrafiltration using Sartorius Vivaspin 500 MWCO 3000 prior to GF-AAS) (n ≥ 4)0.05 ± 0.01 mg Ag/L (day 0)0.04 ± 0.01 mg Ag/L (day 2)	NA	In 10 mg/L test medium: 55 ± 11 nm (day 0),57 ± 12 nm (day 1),52 ± 11 nm (day 3).	NA	Zetapotential measurement using BeckmanCoulter DelsaNanoC in test medium Elendt M4 & Holm-Hansen 45:2 (v:v) gave (each n = 3)-9.7 ± 1.2 mV (day 0, @ pH 7.4 ± 0.1),-9.0 ± 1.7 mV (day 1, @ pH 7.5 ± 0.1),-8.3 ± 2.1 mV (day 3, @ pH 7.7 ± 0.1).
11	Christian Polleichtner	2013	Alga, Growth Inhibition Test	study report	no	Toxicity to aquatic algae and cyanobacteria (Desmodesmus)	ENV/JM/MONO(2015)16/PART3 (pp.14-134)	Federeal Environment Agency Germany	×		NM-300K	yellow-brown colloidal suspension (JRC)	JRC	the same for all NM-300K	yes		10% w/w% NM-300K and 4% w/w% each of Polyoxyethylene Glycerol, Trioleate and Polyoxyethylene Sorbitan mono-Laurat (see JRC repository)	NA	none		~15nm and 5nm (see size districution in JRC report)	mostly round, but also triangular or trapezium-like (JRC report)	NA		Not specified	not said in the dossier but probably like the other ones from Polleichtner	not said in the dossier but probably like the other ones from Polleichtner	not said in the dossier but probably like the other ones from Polleichtner		freshwater according to OECD 201	1) NM300K 1: 0.001, 0.002, 0.003, 0.006, 0.012, 0.024, 0.048, 0.077 mg/L; 2) NM300K 2: 0.002, 0.005, 0.010, 0.020, 0.030, 0.040, 0.050 mg/L; 3) NM300K 3: 0.010, 0.020, 0.040, 0.060, 0.080, 0.100, 0.120, 0.150, 0.200 mg/L; 4) NM300K 4: 0.005, 0.007, 0.010, 0.025, 0.050, 0.075, 0.100, 0.250 mg/L; 5) NM300K DIS: 0.007, 0.013, 0.027, 0.053, 0.106, 0.212, 0.424, 0.849 mg/L; 6) silver ions 1: 0.00099, …	negative and prositive (silver ions)	yes use of NM 300K DIS	Daphnia magna		NA	NA	NA	NA	NA
12	Christian Polleichtner	2013	Alga, Growth Inhibition Test	study report	no	Toxicity to aquatic algae and cyanobacteria (Anabaen)	ENV/JM/MONO(2015)16/PART3 (pp.134-372)	Federeal Environment Agency Germany	×		NM-300K	yellow-brown colloidal suspension (JRC)	JRC	the same for all NM-300K	yes		10% w/w% NM-300K and 4% w/w% each of Polyoxyethylene Glycerol, Trioleate and Polyoxyethylene Sorbitan mono-Laurat (see JRC repository)	NA	none		~15nm and 5nm (see size districution in JRC report)	mostly round, but also triangular or trapezium-like (JRC report)	NA		deionised water	preperation of stock solution	ultrasonicated for 15min (VWR USC+==T @ 45 kHz)	2% silver content (according to SOP TUDr)		US EPA AAP-medium contains several mineral salts and has the ionic strength of 1.0 mM (calculated using PHREEQCi v.3, USGS). Main components are NaNO3, NaHCO3, MgCl2 and MgSO4	1) NM300K 1: 0.000, 0.002, 0.004, 0.020, 0.100, 0.400 mg/L; 2) NM300K 2: (measured concentration): 0.4229, 0.8777, 1.7269, 4.7055, 11.8120, 27.2960 µg/L; 3) NM300K 3: 0.0005, 0.0013, 0.0031, 0.0078, 0.0195, 0.0488 mg/L; 4) Silver ions 1: 0.000006, 0.000019, 0.000064, 0.000190, 0.000635, 0.001905 mg/L; 5) Silver ions 2: 0.00001, 0.00003, 0.0001, 0.0003, 0.001, 0.003 mg/L	negative and positive (AgNO3)	NA	Anabaena flos-aquae		NA	NA	No agglomeration	NA	Zetapotential measurement using BeckmanCoulter DelsaNanoC in test medium gave (each n = 3)-19.4 ± 1.7 mV (day 0, @ pH 7.4 ± 0.1),-17.6 ± 2.5 mV (day 1, @ pH 7.4 ± 0.1),-14.9 ± 2.3 mV (day 2, @ pH 7.4 ± 0.1).
13	Maria Engelke		Algae Growth Inhibition Test	study report	no	Toxicity to aquatic algae and cyanobacteria (Pseudokirchneriella)	ENV/JM/MONO(2015)16/PART3 (pp.372-375)	?	×		NM-300K	yellow-brown colloidal suspension (JRC)	JRC	the same for all NM-300K	yes		10% w/w% NM-300K and 4% w/w% each of Polyoxyethylene Glycerol, Trioleate and Polyoxyethylene Sorbitan mono-Laurat (see JRC repository)	NA	none		~15nm and 5nm (see size districution in JRC report)	mostly round, but also triangular or trapezium-like (JRC report)	NA		demineralized autoclaved water	preperation of stock solution	ultrasonicated for 15min (VWR USC+==T @ 45 kHz)	2% silver content (according to SOP TUDr)		Test medium for green algae Desmodesmus subspicatus (OECD TG 201) contains several mineral salts and has the ionic strength of 1.7 mM (calculated using PHREEQCi v.3, USGS). Main components are NaHCO3, NH4Cl, CaCl2 and MgSO4.	1-1000 µg/L	negative control	yes use of NM 300K DIS	Pseudokirchnerella subcapitata		Dissolved silver content was (via ultrafiltration using Sartorius Vivaspin 500 MWCO 3000 prior to GF- AAS) (n ≥ 4)0.05 ± 0.01 mg Ag/L (for day 0 & day 3)	NA	In 10mg/L: 50 ± 10 nm (day 0),57 ± 12 nm (day 1),57 ± 12 nm (day 3). No agglomeration	NA	Zetapotential measurement using BeckmanCoulter DelsaNanoC gave (each n = 3)-15.9 ± 1.5 mV (day 0, @ pH 8.0 ± 0.1),-15.0 ± 1.2 mV (day 1, @ pH 8.0 ± 0.1),-16.7 ± 2.2 mV (day 3, @ pH 7.9 ± 0.1).
14	Christian Polleichtner	2013	Lemna species Growth Inhibition Test	study report	no	Toxicitiy to aquatic species other than algae (Lemna)	ENV/JM/MONO(2015)16/PART4 (pp.14-143) and ENV/JM/MONO(2015)16/PART5 (pp.14-182)	Federal Environment Agency Germany	×		NM-300K	yellow-brown colloidal suspension (JRC)	JRC	the same for all NM-300K	yes		10% w/w% NM-300K and 4% w/w% each of Polyoxyethylene Glycerol, Trioleate and Polyoxyethylene Sorbitan mono-Laurat (see JRC repository)	NA	none		~15nm and 5nm (see size districution in JRC report)	mostly round, but also triangular or trapezium-like (JRC report)	NA		NA	preperation of stock solution	ultrasonicated for 15min (VWR USC+==T @ 45 kHz)	2% silver content (according to SOP TUDr)		Steinberg medium and has the ionic strength of 9.3 mM (calculated using PHREEQCi v.3, USGS). Main components are NaNO3, potassium phosphate buffer and Ca(NO3)2.	1) NM300K 1: 0.001, 0.006, 0.036, 0.217, 1.3, 7.81 mg/L; 2) NM300K 2: 0.006, 0.036, 0.217, 1.3, 3.9, 7.81 mg/L; 3) NM300K 3: 0.006, 0.036, 0.217, 1.3, 3.9, 7.81 mg/L; 4) NM300K DIS: 0.009, 0.053, 0.319, 1.916, 11.495, 68, 969 mg/L; 5) NM300K silver ions: 0.000, 0.000, 0.002, 0.014, 0.083, 0.495 mg/L, 6) NM300K silver nitrates: 0.000, 0.001, 0.004, 0.022, 0.130, 0.780 mg/L	negative and positive control (AgNO3)	yes use of NM 300K DIS	Lemna minor		Dissolved silver content was (via ultrafiltration using Sartorius Vivaspin 500 MWCO 3000 prior to GF-AAS) (n ≥ 4)0.32 ± 0.04 mg Ag/L (day 0)0.43 ± 0.03 mg Ag/L (day 7)	NA	In 10mg/L: 31 ± 7 nm (day 0),37 ± 8 nm (day 3),39 ± 9 nm (day 7). No agglomeration	NA	-0.7 ± 2.0 mV (day 0, @ pH 5.9 ± 0.1),-3.2 ± 1.1 mV (day 3, @ pH 6.0 ± 0.1),-3.2 ± 1.3 mV (day 7, @ pH 6.0 ± 0.1).
15	Maria Engelke	2012	OECD TG 211 Lemna species Growth Inhibition Test	study report	no	Toxicitiy to aquatic species other than algae (Lemna)	ENV/JM/MONO(2015)16/PART5 (pp.183-187)	?	×		NM-300K	yellow-brown colloidal suspension (JRC)	JRC	the same for all NM-300K	yes		10% w/w% NM-300K and 4% w/w% each of Polyoxyethylene Glycerol, Trioleate and Polyoxyethylene Sorbitan mono-Laurat (see JRC repository)	NA	none		~15nm and 5nm (see size districution in JRC report)	mostly round, but also triangular or trapezium-like (JRC report)	NA		demineralized water	preperation of stock solution	ultrasonicated for 15min (VWR USC+==T @ 45 kHz)	2% silver content (according to SOP TUDr)		Steinberg medium and has the ionic strength of 9.3 mM (calculated using PHREEQCi v.3, USGS). Main components are NaNO3, potassium phosphate buffer and Ca(NO3)2.	300 – 10000 μg Ag/L	negative control	yes use of NM 300K DIS	Lemna minor		Dissolved silver content was (via ultrafiltration using Sartorius Vivaspin 500 MWCO 3000 prior to GF- AAS) (n ≥ 4)0.32 ± 0.04 mg Ag/L (day 0)0.43 ± 0.03 mg Ag/L (day 7)	NA	In 10mg/L: 31 ± 7 nm (day 0),37 ± 8 nm (day 3),39 ± 9 nm (day 7). No agglomeration	NA	-0.7 ± 2.0 mV (day 0, @ pH 5.9 ± 0.1),-3.2 ± 1.1 mV (day 3, @ pH 6.0 ± 0.1),-3.2 ± 1.3 mV (day 7, @ pH 6.0 ± 0.1).
16	Christian Polleichtner	?	?	study report	no	Toxicitiy to aquatic species other than algae (Microphyllum spicatum)	ENV/JM/MONO(2015)16/PART5 (pp.187-201)	Federal Environment Agency Germany	×		NM-300K	yellow-brown colloidal suspension (JRC)	JRC	the same for all NM-300K	yes		10% w/w% NM-300K and 4% w/w% each of Polyoxyethylene Glycerol, Trioleate and Polyoxyethylene Sorbitan mono-Laurat (see JRC repository)	NA	none		~15nm and 5nm (see size districution in JRC report)	mostly round, but also triangular or trapezium-like (JRC report)	NA		NA	preperation of stock solution	ultrasonicated for 15min (VWR USC+==T @ 45 kHz)	2% silver content (according to SOP TUDr)		Andrews medium contains several mineral salts and saccharose and has the ionic strength of 5.0 mM (calculated using PHREEQCi v.3, USGS). Main components are saccharose, KNO3, Ca(NO3)2 and MgSO4.	1) NM300K1: 0.001, 0.010, 0.100, 1.000, 10.000 mg/L; 2) NM300K 2: 0.01, 0.02, 0.10, 0.25, 1, 2.50 mg/L; 3) Silver nitrate: 0.0001, 0.0010, 0.0100, 0.1000, 1.0000 mg/L; 4) Silver ions: 0.0001, 0.0006, 0.0063, 0.0635, 0.6350 mg/L	negative and positive control (AgNO3)	NA	Myriphyllum spicatum		NA	NA	In 10mg/L: 38 ± 8 nm (day 0),35 ± 7 nm (day 7),31 ± 7 nm (day 14). No agglomeration	NA	-2.5 ± 1.2 mV (day 0, @ pH 6.1 ± 0.1),-7.9 ± 0.9 mV (day 7, @ pH 6.2 ± 0.1),-10.1 ± 0.9 mV (day 14, @ pH 6.1 ± 0.1).
17	?	?	?	?	?	Toxicity to microorganisms (Escherichia coli)	ENV/JM/MONO(2015)16/PART6 (pp.14-18 and pp.115-120)	?	×		Citrate capping silver nanoparticle	black colloidal suspension	ABC NANOTECH C., LTD, KOREA	NA	yes		20% cAgNP by weight	NA	Citrate capping (0.5-1.5%)		NA	NA	NA		NA	NA	Not specified	Not specified		L medium ± S9 mixturePROCEDURE	1) 0, 0.03, 0.32, 3.23, 16.13 and 32.26 mg/L cAgNP; 2) 0, 0.03, 0.32, 3.23, 16.13 and 32.26 mg/L Ag+	positive (0.03, 0.32, 3.23, 32.26, 322.58 uM 4NQO)	NA	Escherichia coli PQ37		NA	NA	NA	NA	NA
18	Park HJ et al.	2013	Biofilm-Inactivating Activity of Silver Nanoparticles: A Comparison with Silver Ions.	publication	yes	Toxicity to microorganisms (Pseudomonas aeruginosa)	ENV/JM/MONO(2015)16/PART6 (pp.19-23 and 121-123)	Journal of Industrial and Engineering Chemistry	in 2015: 4.179		Citrate capping silver nanoparticle	black colloidal suspension	ABC NANOTECH C., LTD, KOREA	NA	yes		20% cAgNP by weight and 0.08 mg/L (<1%) ionic silver	NA	Citrate capping (0.5-1.5%)		7.9 nm (TEM) and 12.2 nm (ELS) according to manufacturer. see Supplementary material of the study (~30-82.5 nm)	spherical	NA		deionized water	not specified	Not specified	Not specified		Tryptic soy broth	P. aeruginosa PA01 was exposed to the AgNPs (10 mg/L) and Ag ions (AgNO3, 1 and 10 mg/L)	positive (AgNO3)	NA	Pseudomonas aeruginosa PA01		The AgNP dispersion (10 mg/L total silver content) included ca. 0.08 mg/L (<1%) ionic silver (data not shown), indicating that the effect of free silver ions was negligible.	NA	NA	NA	-42 mV
19	?	?	?	?	no	Toxicity to microorganisms	ENV/JM/MONO(2015)16/PART6 (pp.24-29 and pp.107-110)	Ministry of Environment, Korea	×		bare AgNP	Ag nanopowder	Sigma Aldrich (USA)	NA	no		NA	NA	different capping: Sodium dodecylbenzenesulfonate (NaDDBS), Sodium dodecylsulfate (SDS), Tween 80 (TW80), Cetrimonium bromide (CTAB), Polyvinylpyrrolidone (PVP), Poly allylamine hydrochloride (PAH), Critical micelle concentration (CMC) were used as polymer stabilizers.		NA	NA	NA		Not specified	preperation of stock solution	suspensions were prepared using physical methods, i.e., sonication, stirring, and nanofilteration. The AgNPs were stirred for 1 day.	Not specified		Not specified	0.4 and 0.8 mg/L of AgNPs	Not specified	NA	Escherichia coli		NA	NA	NA	NA	NA
20	Kim SW	2011	Assay-Dependent Effect of Silver Nanoparticles to Escherichia coli and Bacillus subtilis.	publication	yes	Toxicity to microorganisms	ENV/JM/MONO(2015)16/PART6 (pp.29-35, pp. 35-41, pp. 111-115, pp.124-127)	APPLIED MICROBIOLOGY AND BIOTECHNOLOGY	in 2015: 3.376		Citrate capping silver nanoparticle	black colloidal suspension	ABC NANOTECH C., LTD, KOREA	NA	yes		20% cAgNP by weight	NA	Citrate capping (0.5-1.5%)		mean= 10nm. In 10mg/L water: 37-47 nm	spherical	NA		Not specified	Not specified	Not specified	Not specified		1) Luria-Bertani liquid medium (2.5% W/V LB broth) for the growth inhibition assay; 2) Luria-Bertani agar plates for the CFU assay; 3) deionized water for the liquid-to-plate assay.	Growth inhibition assay: 0, 10, 30 and 50 mg/L for both E. coli and B. subtilis- Colony forming unit assay: 0, 1, 5, and 10 mg/L for both E. coli and B. subtilis- Liquid-to-plate assay: 0, 0.025, 0.05, and 0.25 mg/L for both E. coli and B. subtilis	LB medium	NA	Escherichia coli and Bacillus subtilis		NA	release of ions silver: 0.55 ± 0.20 mg/L under the growth inhibi- tion test conditions and 2.09 ± 0.87 mg/kg under LB agar test conditions.	10mg/L In LB medium: 118 to 104 nm (DLS).	NA	NA
21	Maria Engelke	2012	Solid-Contact Test with Arthrobacter gloniformis DIN 38412-48 (see Engelke et al 2014)	study report	no	Toxicity to microorganisms	ENV/JM/MONO(2015)16/PART6 (pp.41-44)	University of Bremen, Germany (testing laboratories)	×		NM-300K	yellow-brown colloidal suspension (JRC)	JRC	the same for all NM-300K	yes		10% w/w% NM-300K and 4% w/w% each of Polyoxyethylene Glycerol, Trioleate and Polyoxyethylene Sorbitan mono-Laurat (see JRC repository)	NA	none		~15nm and 5nm (see size districution in JRC report)	mostly round, but also triangular or trapezium-like (JRC report)	NA		deionized water	preperation of stock solution	ultrasonicated for 15min (VWR USC+==T @ 45 kHz)	2% silver content (according to SOP TUDr)		Test medium for dehydrogenase inhibition of Arthrobacter (DIN 38412-48) contains sodium chloride, glucose and proteins and has the ionic strength of 11.4 mM (calculated using PHREEQCi v.3, USGS). Components are peptone, yeast extract, glucose and NaCl.	10 – 100 mg/kg d.w. for NM300K	negative control (uncontaminated soil) and NM-300 dispersant	yes NM-300K DIS	Arthrobacter sp.		Dissolved silver content was (via ultrafiltration using Sartorius Vivaspin 500 MWCO 3000 prior to GF- AAS) (n ≥ 4)0.06 ± 0.01 mg Ag/L (day 0, 2h)	NA	34 ± 7 nm (day 0, 2h). No aggregation	NA	Zetapotential measurement using BeckmanCoulter DelsaNanoC in test medium gave (each n = 3)-22.0 ± 1.7 mV (day 0, 2h, @ pH 7.0 ± 0.1).(Identifier Reference Material/Nanomaterial; Identity NM 300 K)
22	Christian Polleichtner	2013	Luminescent Bacteria Test	study report	no	Toxicity to microorganisms	ENV/JM/MONO(2015)16/PART6 (pp.44-107)	Federal Environment Agency	×		NM-300K	yellow-brown colloidal suspension (JRC)	JRC	the same for all NM-300K	yes		10% w/w% NM-300K and 4% w/w% each of Polyoxyethylene Glycerol, Trioleate and Polyoxyethylene Sorbitan mono-Laurat (see JRC repository)	NA	none		~15nm and 5nm (see size districution in JRC report)	mostly round, but also triangular or trapezium-like (JRC report)	NA		deionized water	preperation of stock solution	ultrasonicated for 15min (VWR USC+==T @ 45 kHz)	2% silver content (according to SOP TUDr)		Not specified	1) NM300K 1: 0.31, 0.63, 1.25, 2.50, 5.00, 10.00, 20.00 mg/L; 2) NM300K 2: 0.39, 078, 1.56, 3.13, 6.25, 12.50, 25.00, 50.00 mg/L; 3) NM300k 3: 0.78, 1.56, 3.13, 6.25, 12.5, 25.0, 50.0 mg/L; 4) NM300k 4: 0.78, 1.56, 3.13, 6.25, 12.5, 25.0, 50.0 mg/L; 5) NM300K DIS: 3.45, 6.91, 13.82, 27.63, 55.26, 110.53, 221.06, 442,12 mg/L; 6) silver nitrate: 0.156, 0.313, 0.625, 1.250, 2.500, 5.000, 10.000 mg/L…	positive control (AgNO3) and negative control	yes NM-300K DIS	Vibrio fisheri		NA	NA	NA	NA	NA
23	Völker et al.	2014	Combined effects of silver nanoparticles and 17α-ethinylestradiol on the freshwater mudsnail Potamopyrgus antipodarum	publication	yes	Toxicity to other aquatic organisms (Potamopyrgus antipodarum)	ENV/JM/MONO(2015)16/PART6 (pp.128-130)	ENVIRONMENTAL SCIENCE AND POLLUTION RESEARCH	in 2015: 2.76		NM-300	yellow-brown colloidal suspension (JRC)	GmbH (Regensburg, Germany)	the same for all NM-300	yes		10 % silver, 7 % ammonium nitrate, 8 % emulsifier (PVP), and 75 % de-ionised water	NA	PVP		~15nm and 5nm (see size districution in JRC report)	mostly round, but also triangular or trapezium-like (JRC report)	NA		demineralized water	preperation of stock solution	stirring for 30 seconds	100 mg NM-300 in 20 ml		reconstituted water (0.3 g l−1 Tropic Marin® sea salt; Wartenberg, Germany) and 0.18 g l−1 sodium hydrogen car- bonate (NaHCO3) at 16 ± 1 °C and a light/dark regime of 16:8 h.	0.1, 10, 31.25,62.5, 125, 250, 500, 1000 μg/L	negative control: water and dispersant	yes use of NM-300 DIS	Potamopyrgus antipodarum		~2% (10mg/L) after 48h	NA	54.5± 0.35 nm in 10mg/L	NA	-24.4mV (10mg/L)
24	Völker et al.	2015	Toxicity of silver nanoparticles and ionic silver: Comparison of adverse effects and potential toxicity mechanisms in the freshwater clam Sphaerium corneum	publication	yes	Toxicity to other aquatic organisms ( Spaerium corneum)	ENV/JM/MONO(2015)16/PART6 (pp.130-132)	Nanotoxicology	in 2015: 7.913		NM-300	yellow-brown colloidal suspension (JRC)	GmbH (Regensburg, Germany)	the same for all NM-300	yes		10% silver, 7% ammonium nitrate, 8% emulsifier (4% w/w% each of polyoxyethylene glycerol trioleate and polyoxyethylene (20) sorbitan mono-laurate (Tween 20)), and 75% de-ionised water	NA	PVP		~15nm and 5nm (see size districution in JRC report)	mostly round, but also triangular or trapezium-like (JRC report)	NA		deionised water	preperation of stock solution	shaking	50 mg Ag in 20 mL		reconstituted water (ISO medium according to OECD (2004), 110 mM CaCl2, 20.0 mM MgSO47H2O, 30.8 mM NaHCO3, 3.09mM KCl, pH 7.5±0.5	5, 25, 50, 100, 500 μg/L	negative control (water and dispersant) and positive control (AgNO3)	yes use of NM-300 DIS	Sphaerium corneum		less than 2% of the silver mass added to the test media was present in the ionic form after 48 h.	NA	54.4 ± 0.46 nm in 10mg/L	NA	−23.4±1.48mV (10mg/L)
25	Hund- Rinke Kerstin, Klawonn Thorsten		Investigation of two widely used nanomaterials in standardized ecotoxicological tests	study report	no	Sediment toxicity: chironomids	ENV/JM/MONO(2015)16/PART6 (pp.133-165)	Federal Environment Agency	×		NM-300K	yellow-brown colloidal suspension (JRC)	JRC	the same for all NM-300K	yes		10% w/w% NM-300K and 4% w/w% each of Polyoxyethylene Glycerol, Trioleate and Polyoxyethylene Sorbitan mono-Laurat (see JRC repository)	NA	none		~15nm and 5nm (see size districution in JRC report)	mostly round, but also triangular or trapezium-like (JRC report)	NA		tap water	preperation of stock solution	mixed by stirring	200mg/L		sediment-water test system. Artificial sediment: Sphagnum peat, air-dried, finely ground 5%, Kaolinite, air-dried 20%, ndustrial quartz sand, air-dried 75%. The test substrate was wetted with deionised water to reach a water content of about 25% and 30%. Water: Hardness= 100-120mg/L CaCO3 (beginning of test) and 140-170mg/L CaCO3 (end of test), T°= 20.3 °C, pH= 8.0 – 8.2, Dissolved oxygen= 93 - 9…	0.3125, 0.625, 1.25, 2.5, 5.0, and 10.0 mg test item/L	negative control	yes use of NM-300K DIS	Chironomus riparius		NA	NA	NA	see table 3 p. 148 of dossier ENV/JM/MONO(2015)16/PART6 (pp.133-165)	-14.9 mV (10mg/L)
26	?	?	?	?	?	Toxicity to soil macroorganisms execpt arthropods (Caenorhabditis elegans) and Toxicity to terrestrial arthropods	ENV/JM/MONO(2015)16/PART6 (pp.165-170) and ENV/JM/MONO(2015)16/PART7 (pp.30-34)	?	?		Citrate capping silver nanoparticle	black colloidal suspension	ABC NANOTECH C., LTD, KOREA	Not specified	yes		20% cAgNP by weight	NA	Citrate capping (0.5-1.5%)		NA	spherical	NA		NA	NA	NA	NA		NP NGM agar medium	Exposure concentrations of cAgNPs and Ag+ were 0.05, 0.5 and 5 mg/L.	NA	NA	Caenorhabditis elegans		NA	NA	NA	NA	NA
27	Kim SW et al	2012	Interaction of Silver Nanoparticles with Biological Surfaces of Caenorhabditis elegans	publication	yes	Toxicity to soil macroorganisms except arthropods (wild type Caenorhabditis elegans N2 strain) and Toxicity to terrestrial arthropods	ENV/JM/MONO(2015)16/PART6 (pp.170-183) and ENV/JM/MONO(2015)16/PART7 (pp.23-29)	ECOTOXICOLOGY AND ENVIRONMENTAL SAFETY	in 2015: 3.13		Citrate capping silver nanoparticle	black colloidal suspension	ABC NANOTECH C., LTD, KOREA	Not specified	yes		20% cAgNP by weight	NA	Citrate capping (0.5-1.5%)		see figure 1B in Kim SW et al (2012)	spherical	1.4029±0.0096 m2/g		Not specified	Not specified	Not specified	Not specified		NP NGM agar medium	0, 10, 50, 100, 500, and 1000 mg/L for the survival test, and at 0, 1, 5, 10, 50, and 10 mg/L for the reproduction test.	negative control and positive control (AgNO3)	NA	Caenorhabditis elegans N2 strain		NA	Free silver ions were released at 0.17 mg/L and 0.094 mg/L at the maximum concentration of each endpoint-survival and reproduction, respectively.	NA	NA	−31.33mV
28	?	?	?	?	?	Toxicity to soil macroorganisms except arthropods	ENV/JM/MONO(2015)16/PART6 (pp.183-189) and ENV/JM/MONO(2015)16/PART7 (pp.18-23)	?	×		Citrate capping silver nanoparticle	black colloidal suspension	ABC NANOTECH C., LTD, KOREA	Not specified	yes		20% cAgNP by weight	NA	Citrate capping (0.5-1.5%)		NA	spherical	NA		deionised water	direct dosing	Not specified	see composition		5 g of dried NP-amended soil (OECD artificial soil), and DI water was added to give an overall moisture content of about 35% of the dry weight.	up to 2000 mg/kg	Not specified	NA	Eisenia andrei (red tiger worm) and Perionyx excavatus (blue worm)		0.00043	NA	NA	NA	NA
29	Hund- Rinke Kerstin; Klawonn Thorsten	2012	Reproduction test with earthworms In: Investigation of two widely used nanomaterials (TiO2, Ag) in standardized ecotoxicological tests	study report	no	earthworm reproduction	ENV/JM/MONO(2015)16/PART6 (pp.207-235)	Federal Environment Agency	×		NM-300K	yellow-brown colloidal suspension (JRC)	JRC	the same for all NM-300K	yes		10% w/w% NM-300K and 4% w/w% each of Polyoxyethylene Glycerol, Trioleate and Polyoxyethylene Sorbitan mono-Laurat (see JRC repository)	NA	none		~15nm and 5nm (see size districution in JRC report)	mostly round, but also triangular or trapezium-like (JRC report)	NA		1) RefeSol 01-A; 2) cow manure and deionised water	direct dosing	1) thorougly mixing; 2) mixing	see composition		1) RefeSol 01-A, batch IME 01: sand 71%, silt: 24%, clay: 5%, Org C: 0.93%, pH 5.7, clay: 5%). The soil was sieved to ≤ 2 mm. The soil was not sterilized and had been stored outdoors in high-grade stainless steel basins with drainage and ground contact at the test facility. 2) cow manure as feed.	15, 30, 60, 120, 200 mg/kg soil, dry mass (application on soil and on feed))	negative and positive (Carbendazim)	yes use of NM 300K DIS	Eisenia fetida andrei		NA	NA	NA	NA	18 mV (in deionized water)
30	?	2010	Development of environment management system with exposure and impact analysis of the environments exposed to nanomaterials	study report	no	Toxicity to terrestrial arthropods	ENV/JM/MONO(2015)16/PART7 (pp.15-18)	Ministry of Environment, Korea	×		Silver nanoparticles powder	powder	Sigma Aldrich (USA)	Not specified	no		NA	NA	NA		NA	NA	NA		Not specified	Not specified	Not specified	Not specified		NGM agar media as culture media and OP50 as diet	0.1, 0.2, 1.5, 1, 2, 4 mg/L	Not specified	NA	Caenorhabdities elegans		NA	NA	NA	NA	NA
31	Woo-Mi Lee et al	2012	Effect of silver nanoparticles in crop plants Phaseolus radiatus and Sorghum bicolor: Media effect on phytotoxicity	publication	yes	Toxicity to terrestrial plant	ENV/JM/MONO(2015)16/PART7 (pp.34-41 and pp. 45-54)	Chemosphere	in 2015: 3.698		Citrate capping silver nanoparticle	black colloidal suspension	ABC NANOTECH C., LTD, KOREA	Not specified	yes		20% cAgNP by weight	NA	Citrate capping (0.5-1.5%)		5 to 25 nm (average 10 nm) according to manufacturer.	Spherical	NA		deionized water	Not specified	Not specified	Not specified		1) Agar medium: each test unit contained 30 mL of agar culture media (20 mL of 0.5% agar and 10 mL of 0.25% agar) along with a specific concentration of nanoparticles; 2) OECD artificial soil: Each test unit contained 0.07 kg of soil (dry weight) and 0.028 L of deionized water (adjusted mois- ture content of 40%).	1) 0, 5, 10, 20, and 40 mg/L; 2) 0, 100, 300, 500, 1000, and 2000 mg/kg1 dry soil.	negative controls and positive control (AgNO3)	test for the toxicity of citrate on plants at 3mg/L and 150mg/kg (max concentration encountered in the test exposure)	Phasoleus radiatus and Sorhgum bicolor		NA	The maximum concentration of Ag+ released from AgNPs in the agar and soil samples used were measured as 1.3 ± 0.0 mg/L and 2.7 ± mg/kg, respectively.	NA	NA	NA
32	Song et al	2013	Functional Analyses of Nanoparticle Toxicity: A Comparative Study of the Effects of TiO2 and Ag on Tomatoes (Lycopersicon esculentum).	publication	yes	Toxicity to terrestrial plant	ENV/JM/MONO(2015)16/PART7 (pp.42-44 and pp.54-58)	ECOTOXICOLOGY AND ENVIRONMENTAL SAFETY	in 2015: 3.13		Citrate capping silver nanoparticle	black colloidal suspension	ABC NANOTECH C., LTD, KOREA	Not specified	yes		20% cAgNP by weight	NA	Citrate capping (0.5-1.5%)		10-15nm according to manufacturer	NA	NA		distilled water	direct dosing	Not specified	Not specified		filter paper and 5mL of deionized water	0, 50, 100, 500, 1000 and 5000 mg/L	negative controls	NA	Lycopersicon esculentum		NA	NA	In Hoagland's solution: see Song et al (2013) figure 5A	For 100mg/L: 32.1 ± 2.7; For 1000mg/L: 148.1 ± 34.0; For 5000mg/L: 1064.6 ± 180.8. See table 3 in Song et al (2013)	In Hoagland's solution: see Song et al (2013) figure 5B
33	Schlich	?	Terrestrial Plant Test: Seedling Emergence and Seedling Growth Test (OECD 208)	study report	no	Toxicity to terrestrial plant	ENV/JM/MONO(2015)16/PART7 (pp.59-61)	Fraunhofer Institute for Molecular Biology and Applied Ecology	×		NM-300K	yellow-brown colloidal suspension (JRC)	JRC	the same for all NM-300K	yes		10% w/w% NM-300K and 4% w/w% each of Polyoxyethylene Glycerol, Trioleate and Polyoxyethylene Sorbitan mono-Laurat (see JRC repository)	NA	none		~15nm and 5nm (see size districution in JRC report)	mostly round, but also triangular or trapezium-like (JRC report)	NA		deionised water	preperation of stock solution	15 minutes sonication (ultrasonic bath; 35 kHz)	2 mL NM-300K containing 200 mg Ag + 8 mL deionised water		carrier soil (5%) and test soil (95%). Test soil is uncontaminated soil	1.5, 4.5, 13.5, 40.5, 121.5 mg/kg dry soil	Not specified	NA	Phasoleus aureus		NA	NA	NA	NA	NA
34	Schlich	2012	N-Transformation (OECD 216)	study report	no	Toxicity of soil microorganisms	ENV/JM/MONO(2015)16/PART7 (pp.61-64)	Fraunhofer Institute for Molecular Biology and Applied Ecology	×		NM-300K	yellow-brown colloidal suspension (JRC)	JRC	the same for all NM-300K	yes		10% w/w% NM-300K and 4% w/w% each of Polyoxyethylene Glycerol, Trioleate and Polyoxyethylene Sorbitan mono-Laurat (see JRC repository)	NA	none		~15nm and 5nm (see size districution in JRC report)	mostly round, but also triangular or trapezium-like (JRC report)	NA		deionised water	preperation of stock solution	15 minutes sonication (ultrasonic bath; 35 kHz)	2 mL NM-300K containing 200 mg Ag + 8 mL deionised water		carrier soil (5%) and test soil (95%). The test soil is RefeSol 01A 1	15, 45, 100, 200 mg/kg dry soil.	negative	yes use of NM 300K DIS	microorganisms		NA	NA	NA	NA	NA
35	Schlich	2013	C-Transformation Test (OECD 217)	study report	no	Toxicity of soil microorganisms	ENV/JM/MONO(2015)16/PART7 (pp.64-67)	Fraunhofer Institute for Molecular Biology and Applied Ecology	×		NM-300K	yellow-brown colloidal suspension (JRC)	JRC	the same for all NM-300K	yes		10% w/w% NM-300K and 4% w/w% each of Polyoxyethylene Glycerol, Trioleate and Polyoxyethylene Sorbitan mono-Laurat (see JRC repository)	NA	none		~15nm and 5nm (see size districution in JRC report)	mostly round, but also triangular or trapezium-like (JRC report)	NA		deionised water	preperation of stock solution	15 minutes sonication (ultrasonic bath; 35 kHz)	2 mL NM-300K containing 200 mg Ag + 8 mL deionised water		carrier soil (5%) and test soil (95%). The test soil is RefeSol 01A 1	1.67, 5.00, 15.00, 45.00, 100.00 mg/kg dry soil.	negative	NA	microorganisms		NA	NA	NA	NA	NA
36	?	?	?	?	?	Toxicity of soil microorganisms and toxicity to other above ground organisms	ENV/JM/MONO(2015)16/PART7 (pp.68-72 and pp.73-78)	?	?		Citrate capping silver nanoparticle	black colloidal suspension	ABC NANOTECH C., LTD, KOREA	Not specified	yes		20% cAgNP by weight	NA	Citrate capping (0.5-1.5%)		NA	Spherical	NA		Not specified	Not specified	Not specified	Not specified		Natural soil, Konkuk Univ. (Seoul, Korea)	NA	Unamended soil was used as a control.	Two kinds of method blank were prepared to correct background absorbance. Soil treated with 3.5 mL of formaldehyde to inhibit microbial activity was used as a method blank to correct the absorbance of soil extract. Amended soil with cAgNPs in the absence of substrate was used as the second method blank to correct the absorbance due to cAgNPs themselves.	urease, dehydrogenase, acid phosphatase, arylsulfatase, ß-glucosidase, and hydrolysis of fluorescein diacetate (FDA)		NA	NA	NA	NA	NA
37	Schlich	2013	Hazard assessment of a silver nanoparticle in soil applied via sewage sludge	publication	yes	Toxicity to sludge-Respiration inhibition	ENV/JM/MONO(2015)16/PART6 (pp. 189-207) and ENV/JM/MONO(2015)16/PART7 (pp.78-79)	Environmental Sciences Europe	?		NM-300K	yellow-brown colloidal suspension (JRC)	JRC	the same for all NM-300K	yes		10% w/w% NM-300K and 4% w/w% each of Polyoxyethylene Glycerol, Trioleate and Polyoxyethylene Sorbitan mono-Laurat (see JRC repository)	NA	none		~15nm and 5nm (see size districution in JRC report)	mostly round, but also triangular or trapezium-like (JRC report)	NA		deionised water	preperation of stock solution	15 minutes sonication (ultrasonic bath; 35 kHz)	2 mL NM-300K containing 200 mg Ag + 8 mL deionised water		1) test on soil microorganisms: RefeSol 01A. 2) Sewage sludge from the municipal sewage treatment plant in Schmallenberg, Germany.	1) test on soil microorganisms: 0.56, 1.67, 5.0 and 15.0 mg/kg dry soil; 2) respiration inhibition test: 1, 3, 9, 27, 50, 81, 100 mg/L; 3) Manually spiked: 0.04, 0.4, 0.8, 1.6 mg/L ; 4) Sewage treatment plant simulation: 0.04, 0.4, 0.8, 1.6 mg/L	positive control (AgNO3) and negative control	yes use of NM 300K DIS	microorganisms		NA	NA	NA	NA	NA
38	El Badawi et al	2011	Surface Charge- Dependent Toxicity of Silver Nanoparticles	publication	yes	Surface Charge-Dependent Toxicity of Silver Nanoparticles	ENV/JM/MONO(2015)16/PART7 (pp.80-81)	Environmental Science and Technology	in 2015: 5.393		1) uncoated H2-AgNPs, 2) citrate coated AgNPs (Citrate- AgNPs), 3) polyvinylpyrrolidone coated AgNPs (PVP-AgNPs), and 4) branched polyethyleneimine coated AgNPs (BPEI- AgNPs)	Not specified	themselves	Not specified	no		Not specified	Conductivity was used as an indicator for the presence of impurities in the synthesized AgNPs suspensions. See El Badawi et al (2011), SI Table S2	1) uncoated H2-AgNPs, 2) citrate coated AgNPs (Citrate- AgNPs), 3) polyvinylpyrrolidone coated AgNPs (PVP-AgNPs), and 4) branched polyethyleneimine coated AgNPs (BPEI- AgNPs)		1) uncoated H2-AgNPs: 18 nm, 2) citrate coated AgNPs (Citrate- AgNPs): 10 nm, 3) polyvinylpyrrolidone coated AgNPs (PVP-AgNPs): 12 nm, and 4) branched polyethyleneimine coated AgNPs (BPEI- AgNPs): 10 nm	all are spherical	NA		Not specified	Not specified	Not specified	Not specified		test media was prepared by adding 1 mL each of phosphate buffer, MgSO4, CaCl2, and FeCl3 solutions to a liter of Milli-Q water. The test media was aerated until saturation with oxygen was reached. For more detail see the SI of Badawi et al (2011)	Not specified (but is more or less seable on figure 1 of Badawi et al., (2011)	A mixture of glucose and glutamic acid (3 mg L-1 each) was used as a positive control and also negative control	NA	gram positive bacillus species		NA	NA	NA	NA	1) uncoated H2-AgNPs: -22mV, 2) citrate coated AgNPs (Citrate- AgNPs): -38mV, 3) polyvinylpyrrolidone coated AgNPs (PVP-AgNPs): -10mV, and 4) branched polyethyleneimine coated AgNPs (BPEI- AgNPs): +40mV
																					32	34	2
