# Supplementary material for: Digging below the surface: the hidden quality of the OECD nanosilver dossier
Source: Royal Society of Chemistry journal article supplement (doi:10.1039/c7en00088j), 2017-01-01
Supplement: c7en00088j2.xlsx [file c7en00088j2.xlsx]

## Sheet: Feuil1
	1. Paper/report Information										2. Information/Identification						3. Chemical Identity				4. Physical Identity				5. Sample preparation					6. Testing parameters						7. Fundamental Behaviour
Report/study number	a. Author	b. Year	c. Title	c. Type	d. Reviewed?	e. Endpoint	f. OECD dossier	g. Journal or testing laboratory	h. Impact factor		a. NM used	c. Form	d. Manufacturer	e. Batch	f. OECD material?		a. composition	b. Impurities	c. Coatings		a. Particle size, size distribution	c. Basic shape	d. BET surface		a. medium of dispersion	b. Preperation of stock/direct dosing	c. Way of dispersal	d. Nominal concentration of stock solution		a. Type of medium used	b. Concentration used for the assay	c. Controls?	d. Check for interferences?	e. Test organism		a. Solubility in test medium	b. Solubility during exposure	c. Particle size distribution in test medium (agglomeration)	d. Particle size distribution during exposure (agglomeration)	c. Zeta potential in test medium
1	Arnaout and Gunsch	2012	Impacts of Silver Nanoparticle Coating on the Nitrification Potential of Nitrosomonas europaea	publication	yes		no	Environmental Science & Technology	in 2015: 5.393		different AgNPs	Not specified	1) citrate AgNP is homemade; 2) GA AgNP is homemade; 3) PVP AgNP comes from Nanostructured & Amorphous Materials, Inc. (Houston, TX)	Not specified	no		1) GA AgNP:~ 1 Ag: 2 GA by weight; 2) citrate AgNP:~ 1 Ag: 1 Citrate by weight; 3) PVP AgNP: 0.3 wt % of PVP coating	NA	Gum Arabic, citrate, and PVP ( 0.3 wt % of PVP coating)		1) citrate AgNP: 25.2 ± 9.3 nm (TEM); 2) GA AgNP: 27 ± 6.5 nm (TEM); 3) PVP AgNP: 21 ± 17 nm (TEM)	PVP AgNP is spherical. The two others as well (TEM image)	NA		deionized water for PVP AgNP. Nanopure water	preparation of stock solution	for PVP sonication during 10min @ 100 A.	Not specified		AOB medium containing 0.2 g/ L MgSO4-7H2O, 20 mg/L CaCl2-2H2O, 87 mg/L K2HPO4, 405 mg/L KH2PO4, 0.01 mg/L Na2MoO4-2H2O, 0.017 mg/L MnSO4-H2O, 0.0004 mg/L CoCl2-7H2O, 0.17 mg/L CuCl2- 2H2O, 0.01 mg/L ZnSO4-7H2O, 1 mg/L chelated iron, and 3.33 g/L (NH4)2SO4	1) GA: 4 and 40 mg/L; 2) citrate AgNP:2 and 20 mg/L; 3) PVP AgNP: 1, 2, and 20 mg/L. AgNP concentrations used in the experiments were 0.2, 2, and 20 ppm.	positive control (AgNO3)	NA	Nitrosomonas europaea		NA	see supplemental information (Table S3)	DLS estimated hydrodynamic diameters of approximately 25 and 68 nm for gum arabic and citrate coated AgNPs, respectively. PVP coated AgNPs showed two diameter peaks at 30 and 128 nm, indicating some aggregation after initial suspension	NA	The measured zeta potential (ZP) values for citrate, GA, and PVP AgNPs in AOB medium were −23.0 ± 1.1, −21.0 ± 1.3, and −11.6 ± 1.8 mV, respectively.
2	Asharini et al	2011	Comparison of the toxicity of silver, gold and platinum nanoparticles in developing zebrafish embryos	publication	yes		no	Nanotoxicology	in 2015: 7.913		AgNP	Not specified	homemade	Not needed	no		5.47% Wt of AgNP	NA	PVA coating		5–25 nm	spherical	NA		water	preparation of stock solution	stirring	5mg/mL		egg water (60 mg/ml of sea salt)	10, 25, 50, 75, and 100 mg/ml	positive (Ag+)	yes, tested the toxicity of PVA	Danio rerio		NA	NA	NA	NA	NA
3	Auffan et al	2014	Salinity-dependent silver nanoparticle uptake and transformation by Atlantic killifish (Fundulus heteroclitus) embryos	publication	yes		no	Nanotoxicology	in 2015: 7.913		Cit-Ag NPs	Not specified	homemade	Not needed	no		NA	NA	Citrate coating		median size value about 3nm	pseudo-spherical	NA		Not specified	Not specified	Not specified	Not specified		0 and 10 (pour mille) ASW (Artificial Sea water, Instant Ocean, OH)	5 mg/ L	negative control	NA	Fundulus heteroclitus		The dissolution measured in these experimental conditions was less than 4wt%	NA	At 0% ASW, the hydrodynamic diameters of the Cit-Ag NPs were ranged between 3 and 120nm. Substantial aggregation occurred at 10% ASW leading to hydrodynamic diameters ranged between 0.3 and 20 µm	NA	At 0% ASW, zeta potential of −30 ± 3 mV at pH 7.5. At 10% ASW
4	Burchardt et al	2012	Effects of Silver Nanoparticles in Diatom Thalassiosira pseudonana and Cyanobacterium Synechococcus sp.	publication	yes		no	Environmental Science & Technology	in 2015: 5.393		AgNP	Not specified	homemade	Not needed	no		See Table S1	NA	maltose coated		20,40, 100 nm	TEM images (Figure 1)	NA		See methods	preparation of stock solution	stirring	Not specified		1) Diatom cultures were kept in artificial seawater (ASW) f/2-medium and or in filtered Boothbay harbor water (Provasoli-Guillard National Center for Culture of Marine Phytoplankton); 2) freshwater medium (blue−green11)	1) Diatom cultures: 10 μM; 2) Synechococcus sp: 3.3 to 10 μM	positive control (AgNO3) and negative	yes use of the solvent only for the control	Thalassiosira pseudonana and Synechococcus sp		The amount of silver dissolved in the particles-free solvent obtained after filtration of 1 mM AgNP preparations was measured by ICP- MS, reaching a maximum 1% of the total silver in the initial preparation (Figure 6).	NA	see Figure 2 (distribution of the three nanoparticles at different times and in the different media)	NA	−38, −49, and −48 mV for the 20, 40, and 100 nm AgNP, respectively.
5	Colman et al	2014	Emerging Contaminant or an Old Toxin in Disguise? Silver Nanoparticle Impacts on Ecosystems	publication	yes		no	Environmental Science & Technology	in 2015: 5.393		different AgNPs: GA AgNP, PVP AgNP	Not specified	Not specified	Not specified	no		Not specified	NA	PVP and GA		1) GA AgNP: 12 ± 9.2 nm; 2) PVP AgNP: 49.3 ± 22.5 nm	NA	NA		Not specified	Not specified	Not specified	Not specified		mesocosm: 63.9% sand, 28.3% silt, and 13.0% clay, with 5.1% loss on ignition	2.5 mg/L for each AgNPs	negative controls and positive (AgNO3)	yes use of the different dispersant alone	Planktonic prokaryotes (bacteria and archaea), phytoplankton and plants		NA	NA	NA	NA	NA
6	Courtis et al	2012	Bioavailability of cobalt and silver nanoparticles to the earthworm Eisenia fetida	publication	yes		no	Nanotoxicology	in 2015: 7.913		QSI-nano silver	powder	Santa Ana, CA, USA	Not specified	no		Not specified	NA	Not specified		20.2±2.5nm	TEM image (Figure 1)	18.4±0.4m2/g		Not specified	Not specified	Not specified	Not specified		artificial soil: 10% dw sphagnum peat, 20% dw kaolinite clay, 70% dw quartz sand 0.09–0.5 mm, 0.4% dw CaCO3 50 g dw soil corresponding to 68 g moist soil per worm. Horse manure for the food	Ag NPs, 0.77 ± 0.10 mg g-1; Ag ions, 0.55 ± 0.15 mg g-1. These are the concentration added to horse manure (food)	negative control	NA	Eisenia fetida		Very small dissolution	NA	NA	NA	−21.1 ± 0.4 mV in Milli Q water
7	Croteau et al	2011	Silver Bioaccumulation Dynamics in a Freshwater Invertebrate after Aqueous and Dietary Exposures to Nanosized and Ionic Ag	publication	yes		no	Environmental Science & Technology	in 2015: 5.393		cit-Ag NPs and HA-Ag NPs	Not specified	homemade	Not needed	no		NA	NA	citrate and humic acid		1) Cit- AgNP: 17 ± 5nm; 2) HA-AgNP:13 ± 3nm	TEM images (Figure S1)	NA		MOD water	preparation of stock solution	stirring for 3h	Not specified		MOD water (moderately hard water; see Table S1)	1) waterborne uptake experiment: Silver exposure concentrations (averaged measurements taken at the beginning and at the end of the experiment) ranged from 0.4 to 60 nM for Ag+, from 0.6 to 87 nM for HA-Ag NPs and from 1 to 72 nM for cit-Ag NPs; 2) diet uptake experiment: 17 to 187 nmoles/g for HA-AgNPs and from 7 to 250 nmoles/g for Cit-AgNPs; 3) elimination experiment: 10 μg/L of cit-Ag NPs for…	positive control (AgNO3)	NA	snails		NA	See Figure 2	See Figure S1	NA	1) Cit- AgNP: −28.2 ± 0.7mV; 2) HA-AgNP: −35 ± 2mV (in moderately hard water)
8	Cunningham et al	2011	Effect of Nanoparticle Stabilization and Physicochemical Properties on Exposure Outcome: Acute Toxicity of Silver Nanoparticle Preparations in Zebrafish (Danio rerio)	publication	yes		no	Environmental Science & Technology	in 2015: 5.393		different AgNPs	powder and aqueous	homemade, Sigma Aldrich, PlasmaChem, andBBI Life	see table 1	no		NA	NA	See Table 1		See Table 1	See Table 2	NA		ultra pure water	preparation of stock solution	sonication using a Soniprep 150 (MSE, London, UK) for 5 min in 30 s pulses at 14 μm amplitude with a nominal operating frequency 23 kHz	50ppm		FSEW [60 μg/ml Ocean sea salts]	0.001 up to 100 ppm (100 mg/L),	negative control and positive control (AgNO3)	NA	Danio rerio		See Figure 2	NA	See Figure 1	NA	See Table 1
9	Das et al	2012	Changes in Bacterial Community Structure after Exposure to Silver Nanoparticles in Natural Waters	publication	yes		no	Environmental Science & Technology	in 2015: 5.393		AgNP	suspension	ViveNano (Toronto, CA)	PN3010L	no		20% Ag of the nominal stock concentration. Dissolved silver concentration in the stock suspension was measured as 0.04% of the total Ag. 1.5 mg/mL.	NA	carboxy-functionalized AgNPs		1−10 nm	NA	NA		Milli Q water	preparation of stock solution	Not specified	30 mg-Ag/L		Site Selection and Sample Collection. Natural water samples were collected in December 2010 from two sites in south-central Ontario, Canada; a stream (Lovers Creek) and a stormwater management pond (SWMP) located in the city of Barrie	0.01, 0.02, 0.1, and 1 mg-Ag/L AgNPs	negative control and positive control (AgNO3)	NA	bacteria community (natural water)		NA	less than 3% (See Figure S2)	NA	NA	−0.04 ± 0.07 mV
10	Das et al	2014	Interactive Effects of Silver Nanoparticles and Phosphorus on Phytoplankton Growth in Natural Waters	publication	yes		no	Environmental Science & Technology	in 2015: 5.393		AgNP	suspension	ViveNano (Toronto, CA)	PN3010L	no		20% Ag of the nominal stock concentration. Dissolved silver concentration in the stock suspension was measured as 0.04% of the total Ag. 1.5 mg/mL.	NA	carboxy-functionalized AgNPs		~10 nm according to manufacturer	NA	NA		Milli-Q water	preparation of stock solution	Not specified	15 mg/L		Lake water was collected in June and July, 2011 from Chemung Lake (44°37′ N, 78°41′W), located in south-central Ontario, Canada	1, 5, and 10 μg/L	negative control	NA	Phytoplankton		NA	less than 3.2%	NA	NA	NA
11	Demir et al	2011¨	Genotoxic analysis of silver nanoparticles in Drosophila	publication	yes		no	Nanotoxicology	in 2015: 7.913		AgNP	suspension	Sigma-Aldrich (St Louis, MO, USA)	Not specified	no		NA	NA	none		<60 nm according to manufacturer. See Figure 1	spherical	NA		distilled water	different dilution for each concentration	no sonication	1.2g/mL (not diluted)		Drosophila instant medium (Carolina Biological Supply Co., Burlington, NC, USA)	0.1, 1, 5 and 10 mM	Ethylene glycol and distilled water were used as negative controls, while ethyl methane- sulfonate (EMS) was used as a positive control. Furthermore use of AgNO3	yes use of dispersant alone	Drosophila melanogaster		NA	NA	NA	NA	− 37.6 mV (See Figure 1)
12	Geisler-Lee et al	2012	Phytotoxicity, accumulation and transport of silver nanoparticles by Arabidopsis thaliana	publication	yes		no	Nanotoxicology	in 2015: 7.913		AgNP	suspension	Ted Pella Inc. (Redding, CA)	Not specified	no		1) 7x10^10; 2) 9x10^9; 3) 1.1x10^9 particles/mL	NA	none		20, 40 and 80 nm	See Figure 1	NA		1/4 Hoagland solution	direct dosing (dilution for each concentration)	mixing	see composition		(1/4)-strength Hoagland media	66.84, 133.68, 267.36 and 534.72 mg/L	negative control and positive control (AgNO3)	NA	Arabidopsis thaliana		Figure S3 A	NA	See Figure S2	NA	NA
13	Georgantzopoulou et al	2012	Ag nanoparticles: size- and surface-dependent effects on model aquatic organisms and uptake evaluation with NanoSIMS	publication	yes		no	Nanotoxicology	in 2015: 7.913		AgNP	1) particle; 2) suspension	1) PlasmaChem GmbH (Berlin, Germany); 2) department of biotehnology, Barathiar University, India	Not specified	no		Not specified	0.004–0.007% of Ni and 0.007–0.01% of Cu while Cr, Mn, Fe, Co, Zn, As, Cd and Pb were not detected at all.	Au layer (~10nm)		1) 20, 200 nm; 2) 23 and 27 nm	See Figure S2	see table 1		distilled water containing 5% DMSO at a concentration 2 mg/mL	preparation of stock solution	sonication on ice for 3 min	1:10 in distilled water		2% NaCl, NBBM medium and Volvic water	1) Vibrio fischeri inhibition of luminescence assay: 0.1–300 mg/L Ag 20 nm and 200 nm, 0.05–100 mg/L Ag NPs 23 nm and Ag NPs 27 nm ; 2) Desmodesmus subspicatus growth inhibiton assay: 0.003-10mg/L for AgNPs 20nm and AgNPs 200nm, 0.0003-1mg/L for AgNP 23nm, 0.003-10mg/L for AgNPs 27nm; 3) Daphnia magna immobilisation assay: 0.0001-10mg/L for AgNPs 20nm, 0.01-3mg/L for AgNPs 200nm, 0.0015-10µg/L fo…	negative controls	yes use of diluent alone	Vibrio fisheri, Daphnia magna, and desmodesmus subspicatus		See Figure 5	NA	See Table 1	NA	See Table 1
14	George et al	2012	Surface Defects on Plate-Shaped Silver Nanoparticles Contribute to Its Hazard Potential in a Fish Gill Cell Line and Zebrafish Embryos	publication	yes		no	ACS NANO	in 2015: 13.334		AgNP	suspension	Nanocomposix (4878 Ronson Court, San Diego, CA	Not specified	no		NA	NA	PVP coated (spheres), cysteine-HCL coated (nanoplates)		10, 20, 40 nm for the nanosphere, 60nm diameter and 5 to 20 µm for the nanowires	spherical, nanoplates, nanowires	NA		deionized water	preparation of stock solution	Not specified	25µg/mL		L-15 medium for cellular studies, Holtfreter's medium for zebrafish experiment	0, 1.25, 2.5, and 5 μg/mL for zebrafish assay, 0.356-25 µg/mL for cell assay	negative controls and positive control (Triton X-100)	NA	Danio rerio and rainbow trout gill cell line		Figure 3A	NA	See table 1	NA	See Table 2
15	Gitipour et al	2013	The Impact of Silver Nanoparticles on the Composting of Municipal Solid Waste	publication	yes		no	Environmental Science & Technology	in 2015: 5.393		PVP AgNP	suspension?	homemade (Badawi et al., 2011)	Not needed	no		Not specified	Conductivity was used as an indicator for the presence of impurities in the synthesized AgNPs suspensions. See El Badawi et al (2011), SI Table S2	PVP coated		12.3 ± 0.5 nm (HDD)	spherical	NA		Not specified	Not specified	Not specified	Not specified		synthetic food waste mixture	2 mg kg−1 of compost	negative control and positive control (AgNO3)	yes purification of the suspension ensured that any observed effects were associated with nanoparticles and not impurities	compost microorganisms community		NA	NA	NA	NA	−10.2 mV
16	He et al	2012	Silver NanoparticleAlgae Interactions: Oxidative Dissolution, Reactive Oxygen Species Generation and Synergistic Toxic Effects	publication	yes		no	Environmental Science & Technology	in 2015: 5.393		Cit-Ag NPs	suspension	homemade	Not needed	no		NA	NA	Citrate coating		56 (±5) nm (in Milli Q water)	NA	NA		Milli Q water	preparation of stock solution	stirring	200 μM AgNP		for algal assay: GSe medium	for algal assay: 0.02, 0.2, 2, 10, and 20 μM	negative control and positive control (AgNO3)	NA	Chattonella marina and Oncorhynchus mykiss		See Figure 2	See Figure 2	See Figure 1a	NA	See Figure 1b
17	Ivask et al	2014	Toxicity Mechanisms in Escherichia coli Vary for Silver Nanoparticles and Differ from Ionic Silver	publication	yes		no	ACS NANO	in 2015: 13.334		different AgNPs	aqueous dispersion	1) cit-AgNPs: Nano- composix (CA, USA); 2) PVP and BPEI coated: homemade;	Not specified	no		Not specified	NA	citrate, PVP, and BPEI coating		See Table 1	spherical	NA		10% FBS	preparation of stock solution	sonication for 15 min	Not specified		LB medium supplemented with 5% FBS.	See Figure 1	negative control and positive control (AgNO3)	NA	Escherichia coli		See Table 2	NA	See Table 1	NA	See Table 1
18	Jang MH et al	2014	Uptake, Tissue Distribution, and Depuration of Total Silver in Common Carp (Cyprinus carpio) after Aqueous Exposure to Silver Nanoparticles	publication	yes		no	Environmental Science & Technology	in 2015: 5.393		Cit-Ag NPs	suspension	ABC Nanotech Co	Not specified	yes		20.4% (w/w) and 0.55% capping agent.	NA	Citrate coating		11.3 ± 1.6 (TEM)	NA	4.38 x 10^2 nm^2/particle		Not specified	Not specified	Not specified	Not specified		water (not sufficient)	0.5mg/L	Not specified	NA	Cyprinus carpio		NA	NA	NA	NA	NA
19	Kashiwada et al	2012	Silver Nanocolloids Disrupt Medaka Embryogenesis through Vital Gene Expressions	publication	yes		no	Environmental Science & Technology	in 2015: 5.393		AgNP	suspension	Synergenesis, Inc. (Pengilly, MN)	Not specified	no		99.99% purity. 10mg/L	purity confirmed	Not specified		3.6 nm	NA	NA		ultra pure water	Not specified	Not specified	Not specified		ERM (embryo-rearing medium; 1.0 g NaCl, 0.03 g KCl, 0.04 g CaCl2·2H2O, 0.163 g MgSO4·7H2O in 1 L of ultrapure water, adjusted pH to 7.2 with 1.25% NaHCO3)	0, 0.5, and 1.0 mg/L; 0.5 mg/L ; 0, 0.005, 0.05, and 0.5 mg/L; 0 and 0.05 mg/L	negative control	NA	Oryzias latipes		See Figure S1	NA	NA	NA	NA
20	Kaveh et al	2013	Changes in Arabidopsis thaliana Gene Expression in Response to Silver Nanoparticles and Silver Ions	publication	yes		no	Environmental Science & Technology	in 2015: 5.393		AgNP	powder	U.S. Research Nanomaterials (Houston, TX)	Not specified	no		0.9999	NA	PVP coated		20 nm,	spherical	NA		deionized water	preparation of stock solution	sonication for 30 min	The AgNP stock solution was prepared by mixing 1.0 g/L AgNPs [0.1% (w/v)] and 1.0 g/L PVP40 [0.1% (w/v)] with DI water. 5-20mg/L		0.5 strength MS nutrient solution supplemented with 0.3% sucrose and 0.7% phytoagar (pH 7.2), and it was sterilized by autoclaving (121 °C for 15 min)	1.0, 2.5, 5.0, 10, and 20 mg/L	negative controls and positive control (AgNO3)	yes, one control with PVP	Arabidopsis thaliana		NA	NA	27.1 ± 0.3 nm, which shifted to 29.6 ± 0.1 nm after agitation for 24 h at 55 °C (20mg/L)	NA	−38.1 ± 0.3 V, which shifted to −30.9 ± 0.6 V (20mg/L)
21	Kim J. et al	2011	Differentiation of the toxicities of silver nanoparticles and silver ions to the Japanese medaka (Oryzias latipes) and the cladoceran Daphnia magna	publication	yes		no	Nanotoxicology	in 2015: 7.913		two AgNPS	powder	Namatech Co., Ltd (Gyeonggi-do, Korea), and Ferro Corp. (Seoul, Korea)	Not specified	no		NA	NA	none		60nm and 300nm	spherical (TEM images)	NA		M4 medium and fish medium	direct dosing	sonication for 20 min (100W)	see concentration for the assay		M4 medium and fish medium	192 mg/l, 120 mg/l, 8 mg/l and 120 mg/l	negative control and positive control (AgNO3)	NA	Oryzias latipes and Daphnia magna		no but used a sorbant permitting apparently to have only the effect of AgNP	no but used a sorbant permitting apparently to have only the effect of AgNP	See Figure 1	NA	NA
22	McQuillan and Shaw	2014	Differential gene regulation in the Ag nanoparticle and Agþ-induced silver stress response in Escherichia coli: A full transcriptomic profile	publication	yes		no	Nanotoxicology	in 2015: 7.913		AgNP	powder	QinetiQ Nanomaterials Ltd, Farnborough, UK	Not specified	no		pure	no impurities	no coatings		142 ± 20 nm	NA	4m2/g		Luria broth (LB)	direct dosing	sonication	see concentration for the assay		Luria broth (LB)	40 mg/mL	negative control and positive control (AgNO3)	NA	Escherichia coli		See Figure 4 in Mcquillan et al., 2011	NA	NA	NA	NA
23	McQuillan et al	2012	Silver nanoparticle enhanced silver ion stress response in Escherichia coli K12	publication	yes		no	Nanotoxicology	in 2015: 7.913		AgNP	powder	QinetiQ Nanomaterials Ltd, Farnborough, UK	Not specified	no		pure	no impurities	no coatings		142 ± 20 nm	NA	4m2/g		modified Luria-Bertani (LB)	direct dosing	sonication for 30 min	see concentration for the assay		modified Luria-Bertani (LB)	100µg/L; 500 or 1000 µg/mL; 100µg/L; 200µg/L	negative control and positive control (AgNO3)	NA	Escherichia coli		See Figure 4	NA	NA	NA	NA
24	McTeer	2014	Bioaccumulation of silver nanoparticles into Daphnia magna from a freshwater algal diet and the impact of phosphate availability	publication	yes		no	Nanotoxicology	in 2015: 7.913		polymer-coated AgNP	powder	SkySpring Nanomaterials, Houston, USA	0126SH	no		10% Ag/ 90% polymer	NA	polymer coated		~15nm	NA	NA		high- P and low-P TAP media and Milli Q water	preparation of stock solution	Not specified	100mg/L		1) Tris-acetate-phosphate (TAP) liquid medium (for the algea); 2) snail water medium (SSW: 222 mg L–1 CaCl2, 9.6 mg L–1 MgSO4, 4 mg L–1 KHCO3, 5.1 mg L–1 KNO3, 58 mg L–1 NaHCO3) (for Daphnia. The AgNp for the daphnia was found in the food (the algea)	20, 50, and 100 µg/L for the algea;	negative control and positive control (AgNO3)	NA	Chlamydomonas reinhardtii and Daphnia magna		See Table 1	NA	After 1h: 21.92 ± 0.42 and 22.47 ± 0.44 nm in high-P and low-P media, respectively; after 5d: 26.79 ± 1.81 and 28.32 ± 0.81 nm in high- P and low-P media, respectively. See Figure 1	NA	NA
25	Osborne J. et al	2013	Effects of particle size and coating on nanoscale Ag and TiO2 exposure in zebrafish (Danio rerio) embryos	publication	yes		no	Nanotoxicology	in 2015: 7.913		different AgNPs	Not specified	Nanostruc- tured and Amorphous Materials Inc. Houston, USA	Not specified	no		>99% pure	NA	none, citrate, and fulvic acid		10 am 35nm according to manufacturer. According to them: 49.0±18.5nm and 114.0±65nm for the 10nm and 35 nm particles, respectively	NA	9–11 m2 g–1 (10nm particles). 30–50 m2 g–1 (35nm particle)		embryo culture water (0.60 mg of marine salts [Tropic Marin] per litre of deionised water)	preparation of stock solutions	sonication for 30 min	different stick solution: 50 µg/L, 500 µg/L, 5000 µg/L, 50,000 µg/L, 250,000 µg/L		embryo culture water (0.60 mg of marine salts [Tropic Marin] per litre of deionised water)	5 µg/L, 500µg/L, 500 µg/L, 50,00 µg/L, 250,00 µg/L	negative control and positive control (AgNO3)	NA	Danio rerio		between 0.1% and 2%	NA	NA	NA	NA
26	Ostermeyer et al	2013	Influence of Bovine Serum Albumin and Alginate on Silver Nanoparticle Dissolution and Toxicity to Nitrosomonas europaea	publication	yes		no	Environmental Science & Technology	in 2015: 5.393		Cit-Ag NPs	Not specified	nanoComposix Inc., San Diego, CA	Not specified	no		NA	NA	Citrate coating		20nm (primary size). In deionized water: 25.5 ± 0.1 nm (DLS)	NA	NA		deionized water	preparation of stock solution	shaken at 250 rpm for 15 min	1ppm		BSA or alginate	1ppm	positive control (AgNO3)	NA	Nitrosomonas europaea		in the presence of 2.5 mM (NH4)2SO4 and 30 mM HEPES buffer (pH 7.8), the dissolution of 20 nm AgNPs over a 3 h period has been quantified to be either 30% or 34%. AgNPs in test media containing 0, 10, 40, 150, and 600 ppm BSA resulted in 31%, 12%, 14%, 24%, and 47% dissolution, respectively, after 3 h.	NA	NA	NA	The surface charge of AgNPs decreased from −13.99 ± 1.68 mV in the absence of BSA to −10.99 ± 0.68 mV in the presence of 600 ppm BSA suggesting that an interaction between the AgNP surface and BSA was occurring
27	Panacek et al	2011	Acute and Chronic Toxicity Effects of Silver Nanoparticles (NPs) on Drosophila melanogaster	publication	yes		no	Environmental Science & Technology	in 2015: 5.393		AgNP	solid dispersion	homemade	Not needed	no		manitol 5% (w/w), bovine serum albumine 0.01% (w/w), 2.5 mg of Ag per 1 g	NA	manitol coated		29 ± 4 nm (DLS)	spherical	NA		drosophila culture medium	direct dosing	stirring	see concentration for the assay		drosophila culture medium	10mg/L to 100mg/L (acute toxicity test). 5mg/L (chronic test)	negative control	NA	Drosophila melanogaster		NA	NA	NA	NA	−29 ± 5 mV
28	Poynton et al	2012	Toxicogenomic Responses of Nanotoxicity in Daphnia magna Exposed to Silver Nitrate and Coated Silver Nanoparticles	publication	yes		no	Environmental Science & Technology	in 2015: 5.393		PVP AgNP and cit-AgNP	powder (PVP) and homemade (cit)	NanoAmor Inc. (Houston, TX) and homemade (Cit-AgNP)	Not specified	no		Not specified	NA	PVP coated and citrate coated		PVP AgNP: 35nm (TEM). Cit-AgNP: ~40nm (TEM)	See Figure S1	NA		hard reconstituted water	preparation of stock solution	stirring and sonication	100 μg/L		hard reconstituted water	cit. AgNP: 0, 0.625, 1.25, 2.5, 5.0 g./L; PVP AgNP: 0, 3.1, 6.25, 12.5, 25, 50 g./L	negative control and positive control (AgNO3)	NA	Daphnia magna		8.9 ± 1.6% of cit. AgNPs and 11.3 ± 2.2% of PVP AgNPs	NA	65 ± 10 nm for cit-AgNP; 156 ± 2 nm for PVP- AgNP	NA	NA
29	Samberg et al	2011	Antibacterial efficacy of silver nanoparticles of different sizes, surface conditions and synthesis methods	publication	yes		no	Nanotoxicology	in 2015: 7.913		different AgNPs	suspension (washed and unwashed) and powder (carbon coated)	nanoComposix (San Diego, CA, USA)	Not specified	no		Not specified	≤ 60 ppb dissolved silver content and that over 99% of the formaldehyde contaminant was removed by the 5th washing volume equivalent	none for the the suspensions, carbon coated for the powder		20, 50, 80 nm (washed and unwashed), 25 and 35 nm (carbon coated)	spherical	NA		deionized water and MH broth	preparation of stock solution	sonication for 10 min (powder), otherwise just suspended (washed and unwashed)	512µg/L (washed and carbon coated NPS), 32µg/L (unwashed)		Mueller-Hinton (MH) broth and agar	512–0.5 µg/ml (washed and carbon coated) and 32–0.125 mg/ml (unwashed)	negative control and positive control (AgNO3)	yes use of the supernantant alone for toxicity test	Escherichia coli, Salmonella sp., and staphylococcus aureus		NA	NA	See Table 1	NA	See Table 1
30	Scanlan et al	2013	Silver Nanowire Exposure Results in Internalization and Toxicity to Daphnia magna	publication	yes		no	ACS NANO	in 2015: 13.334		Different AgNWs (nanowires)	Not specified	nanoComposix (San Diego, CA)	Not specified	no		Not specified	See Table 1	PVP and SiO2		See Table 1	wires	NA		Not specified	Not specified	Not specified	Not specified		COMBO and EPA media	Not specified	negative control and positive control (AgNO3)	NA	Daphnia magna		See Figure 3	NA	See Figure S2 and S3	NA	NA
31	Shoults-Wilson et al	2011	Effect of silver nanoparticle surface coating on bioaccumulation and reproductive toxicity in earthworms (Eisenia fetida)	publication	yes		no	Nanotoxicology	in 2015: 7.913		different AgNPs	powder	NanoAmor (Nanostructured & Amorphous Materials, Inc; Houston, TX, USA)	Not specified	no		both >95% purity. The coatings accounted for 6.4 and 1.5 wt % of the mass of the PVP and OA powders, respectively.	no metallic impurities	PVP and oleic acid (OA)		30-50nm according to manufacturer	NA	NA		deionized water	preparation of stock solution	sonication	4g/L		The artificial soil medium consisted of 69.58% dry mass quartz sand, 0.43% dry mass crushed limestone, 20% dry mass kaolin clay, and 10% dry mass sphagnum peat moss (sieved to < 2 mm)	10, 100, and 1000 mg/kg	negative control and positive control (AgNO3)	NA	Eisenia fetida		NA	Concentrations of dissolved Ag ions in pore waters were too low to be measured using either ion specific electrodes or ultrafiltration (3 kDa) followed by ICP-MS	56.35 ± 1.16 nm for PVP and 50.60 ± 1.02 nm for OA (both in deionized water). See Figure 1	NA	−35.9 ± 0.8 mV for the PVP-coated particles and −45.4 ± 1.1 mV for the OA-coated particles
32	Stensberg et al	2014	Silver nanoparticle-specific mitotoxicity in Daphnia magna	publication	yes		no	Nanotoxicology	in 2015: 7.913		AgNP	powder	Sigma Aldrich	Not specified	no		Not specified	NA	Not specified		21 to 280 nm (TEM) (See Figure 1). 121 ± 13 nm (DLS)	NA	NA		distilled water	preparation of stock solution	sonication	Not specified		reconstituted hard water (RHW, 120 mg/L MgSO4, 120 mg/L CaSO4, 192 mg/L NaHCO3, 8 mg/L KCl)	6, 8, 10, 12 and 15 mg/L Ag NPs	negative control and positive control (AgNO3)	NA	Daphnia magna		NA	NA	21 to 280 nm (TEM) (See Figure 1). 121 ± 13 nm (DLS)	NA	-39.7 ± 10.7 mV
33	Van aerle et al	2013	Molecular Mechanisms of Toxicity of Silver Nanoparticles in Zebrafish Embryos	publication	yes		no	Environmental Science & Technology	in 2015: 5.393		AgNP	Not specified	Nanostructured and Amorphous Materials Inc., Houston, TX	Not specified	no		99.9% purity	NA	Not specified		10 nm according to manufacturer	spherical	9-11 m2/g		ultrapure water	preparation of stock solution	sonication for 1h	Not specified		artificial water (ISO 7346−3:1996 guideline)	5µg/L	negative control and positive control (AgNO3)	NA	Danio rerio		0.27% ± 0.15%	NA	589 ± 101nm (DLS)	NA	−12.5mV
34	Wang H. et al	2014	Toxicity, Bioaccumulation, and Biotransformation of Silver Nanoparticles in Marine Organisms	publication	yes		no	Environmental Science & Technology	in 2015: 5.393		PVP AgNP and cit-AgNP	suspension	Nanocomposix Inc. (San Diego, CA, USA)	Not specified	no		Not specified	NA	PVP and citrate coatings		~30nm (TEM) according to manufacturer	spherical	NA		Not specified	direct dosing of the received stock solution	sonication for 1h	1000mg/L		Long Island Sound (LIS) sediments	0.75, 7.5, and 75 mg/kg dry sediment weight (DW)	negative control and positive control (AgNO3)	A pure citrate solution was purchased as a background control.	Ampelisca abdita, Americamysis bahia, and Nereis virens		NA	NA	NA	NA	citrate-AgNP: −41.8mV. PVP-AgNP: −26.7mV
35	Wang J. and Wang WX.	2014	Low Bioavailability of Silver Nanoparticles Presents Trophic Toxicity to Marine Medaka (Oryzias melastigma)	publication	yes		no	Environmental Science & Technology	in 2015: 5.393		Cit-Ag NPs	aqueous dispersion	Ted Pella, Inc. (Redding CA, USA)	Not specified	no		Not specified	NA	Citrate coating		20 and 80 nm	spherical	NA		Not specified	preparation of stock solution	Not specified	4mg/L		natural seawater (gently aerated)	1) bioaccumulation in artemia: 0, 25, 50, 100, 250, 500, and 1000 μg/L; 2) assimilation efficiency in medaka: shrimp were exposed to 1mg/L which was then given to the medaka. Another experiment with 250, 500, and 1000 μg/L Ag exposure; 3) Chronic exposure: 200 and 1000 μg/L AgNPs (20 nm)	negative control and positive control (AgNO3)	NA	Oryzias melastigma and artemia nauplii		Continuous dissolution of AgNPs proceeded during the 24-h waterborne AgNPs exposure. The most dissolution at 24 h was observed for 20-nm AgNPs (i.e., 15.2%), while dissolution was 6.6%, 5.3%, and 1.7%, respectively, for the 80-nm AgNPs, 20-nm AgNPs (Tween 20 stabilized), and 80-nm AgNPs (Tween 20 stabilized) (at 1mg/L)	NA	1652.7 nm (20nm AgNP), 3212 nm (80nm AgNP)	NA	zeta-potentials were −10.04 and −12.32 mV for 20- and 80-nm AgNPs, respectively, after 24-h exposure
36	Wang j. et al	2013	Phytostimulation of Poplars and Arabidopsis Exposed to Silver Nanoparticles and Ag+ at Sublethal Concentrations	publication	yes		no	Environmental Science & Technology	in 2015: 5.393		different AgNPs	Not specified	Novacentrix (Austin, TX) for carbon coated and homemade for PEG coated	Not specified	no		Not specified	NA	carbon coated and Poly-ethylene glycol-thiol (PEG)-coated		25nm (carbon-AgNP) (27.3 ± 5.6 nm by TEM), 10 and 5nm (PEG-AgNP)	See Figure S1 (but look spherical)	NA		1/4 strength Hoagland solution	Not specified	Not specified	Not specified		1/4 strength Hoagland solution	from 0 to 100 mg/L	negative control	NA	Arabidopsis thaliana and poplar tree		See Table S2	NA	NA	NA	NA
37	Xiu Z.M. et al	2011	Differential Effect of Common Ligands and Molecular Oxygen on Antimicrobial Activity of Silver Nanoparticles versus Silver Ions	publication	yes		no	Environmental Science & Technology	in 2015: 5.393		Carbon-AgNP	powder	Novacentrix Corporation (Austin, TX)	Not specified	no		0.9992	filtration through 0.22 μm filter (Fisher Scientific, NJ) to get rid of impurities	carbon coated		NA	spherical	NA		Milli Q water	preparation of stock solution	homogenized by an ultrasonic cleaner	Not specified		2 mM sodium bicarbonate buffer	up to 6.2 mg/L	negative control	NA	Escherichia coli		the ion silver content was lower than 3µg/L which is below the minimum lethal concentration	the ion silver content was lower than 3µg/L which is below the minimum lethal concentration	35.4 ± 5.1 nm	NA	−27.0 ± 1.54 mV when prepared and stored anaerobically vs _x0001_−30.0 ± 0.42 mV after 10-day equilibration with air
38	Yang X. et al	2011	Mechanism of Silver Nanoparticle Toxicity Is Dependent on Dissolved Silver and Surface Coating in Caenorhabditis elegans	publication	yes		no	Environmental Science & Technology	in 2015: 5.393		different AgNPs	suspension	homemade and NanoAmor for two PVP-AgNPs	Not specified	no		Not specified	NA	citrate, PVP, GA coated		PVP 8nm, PVP38nm, PVPs, PVPl, CIT7nm, GA5nm, GA22nm. See table 1	spherical	NA		ultra pure water	Not specified	stirring	Not specified		EPA medium and K+ medium	Not specified	negative control and positive control (AgNO3)	NA	caenorhabditis elegans		See Figure 1	NA	See Figure 1	NA	See Figure S5
39	Yang X. et al	2014	Silver Nanoparticle Behavior, Uptake, and Toxicity in Caenorhabditis elegans: Effects of Natural Organic Matter	publication	yes		no	Environmental Science & Technology	in 2015: 5.393		different AgNPs	Not specified	homemade	Not needed	no		Not specified	NA	none, citrate, and PVP		8-50nm	spherical	NA		Not specified	Not specified	Not specified	Not specified		EPA medium	nonfunctionalized silver NPs 0.15 mg/L; PVP-functionalized (8 and 38 nm) 0.5 mg/L; CIT-AgNPs 5 mg/L	negative control and positive control (AgNO3)	NA	caenorhabditis elegans		See Figure 2	NA	129 ± 6 nm (PVP8-Ag NPs), 72 ± 1 nm (PVP38-Ag NPs), 41 ± 3 nm (CIT-Ag NPs), and 122 ± 4 nm (nonfunctionalized).	NA	−21 ± 0.1 mV (PVP8-Ag NPs), −12 ± 1.3 mV (PVP38-Ag NPs), −24 ± 0.7 mV (CIT-Ag NPs), −24 ± 0.6 mV (nonfunctionalized).
40	Yin et al	2011	More than the Ions: The Effects of Silver Nanoparticles on Lolium multiflorum	publication	yes		no	Environmental Science & Technology	in 2015: 5.393		GA- AgNP	suspension	homemade	Not needed	no		Not specified	NA	Gum Arabic (GA)		6 and 25 nm	spherical	100±25 m2/g (6 nm diameter), and 24±4 m2/g (25 nm diameter)		nanopure water	preparation of stock solution	sonication for 10 min (100W)	250mg/L		Not specified	0, 1, 5, 10, 20, and 40 mg/L	negative control and positive control (AgNO3)	yes use of dispersant alone	Lolium multiflorum		less than 3%	NA	NA	NA	−49.5±1.5 mV, and -44.6±0.2mV (6nm and 25nm)
41	Zhao C.M and Wang W.X	2012	Size-Dependent Uptake of Silver Nanoparticles in Daphnia magna	publication	yes		no	Environmental Science & Technology	in 2015: 5.393		different AgNPs	suspension	Ted Pella, Inc. (USA)	Not specified	no		The manufacture supplied the citrate coated AgNPs (20 mg/L) suspended in 2 mM citrate and the tannic acid coated AgNPs (20 mg/L) in Milli-Q.	NA	citrate and tannic acid		20, 50 and 100nm	spherical	NA		Not specified	preparation of stock solution	Not specified	100 μCi/L 110mAg into 18 mg/L AgNP suspensions.		simplified M7 medium (SM7) with modified Ca concentration (20 mg/L, similar to that in creek water). Components of SM7 included CaCl2, MgSO4, K2HPO4, NaNO3, NaHCO3, Na2SiO3, H3BO3, KCl, and KH2PO4	phase 1: 500 μg/L AgNPs. Phase 2: 1, 4, 20, 100, and 500 μg/L	positive control (AgNO3)	NA	Daphnia magna		See Figure 3	NA	See Figure 2	NA	See Figure 2
42	Zhao C.M et al	2010	Biokinetic uptake and efflux of silver nanoparticles in Daphnia magna	publication	yes		no	Environmental Science & Technology	in 2015: 5.393		Carbon-AgNP	suspension	NanoSys GmbH (Wolfhalden, Switzerland)	Not specified	no		NA	NA	carbon coated		20 nm (TEM)	spherical	NA		simplified M7	preparation of stock solution	stirring for 12h	50 μCi/L 110 mAg was mixed with two of 100 mL 0.22 μm-filtered AgNP suspensions at 250 and 5000 μg/L AgNP, but without cysteine addition, in Milli-Q water in a Teflon beaker, respectively		simplified M7 medium (SM7) with modified Ca concentration (20 mg/L, similar to that in creek water). Components of SM7 included CaCl2, MgSO4, K2HPO4, NaNO3, NaHCO3, Na2SiO3, H3BO3, KCl, and KH2PO4	2, 10, 40, and 160 μg/L AgNP	positive control (AgNO3)	NA	Daphnia magna		NA	NA	40-50 nm	NA	−19.6 ±3.5 mV,
43	Zhao C.M et al	2012	Importance of surface coatings and soluble silver in silver nanoparticles toxicity to Daphnia magna	publication	yes		no	Nanotoxicology	in 2015: 7.913		different AgNPs	suspension	NanoSys GmbH (Wolfhalden, Switzerland)	Not specified	no		1000ppm AgNP.	NA	lactate, PVP, and sodium dodecylbenzene sulfonate coating		10-20nm	spherical	NA		Not specified	preparation of stock solution	filtration of the original stock	all three ~1g/L		simplified M7 medium (SM7) with modified Ca concentration (20 mg/L, similar to that in creek water). Components of SM7 included CaCl2, MgSO4, K2HPO4, NaNO3, NaHCO3, Na2SiO3, H3BO3, KCl, and KH2PO4	10, 20, 30, 40 and 50 mg/L for AgNPs- L;0,1,2,4,6and8mg/LforAgNPs-P,and0,1,2,3, 4 and 5 mg/L for AgNPs-S.	negative control and positive control (AgNO3)	NA	Daphnia magna		See Figure 5	See Figure 4	See Figure 2	NA	See Table 1
